# Supplementary material
Source: PubMed Central journal article supplement (PMC5878959)
Supplement: supp_6.1.E1_original_submission.pdf [file supp_6.1.E1_original_submission.pdf]

**Title:**

The Economic Burden of Cancer Care in Canada: Revised and Recent Cost-of-Illness Estimates

**Authors:**

Claire de Oliveira, MA PhD

Centre for Addiction and Mental Health; Institute for Health Policy, Management and Evaluation, University of Toronto; Institute for Clinical Evaluative Sciences

Sharada Weir, MA DPhil

Centre for Addiction and Mental Health

Jagadish Rangrej, MSc MMath

Institute for Clinical Evaluative Sciences

Murray D. Krahn, MD MSc FRCPC

Toronto Health Economics and Technology Assessment Collaborative (THETA); Faculty of Pharmacy and Institute for Health Policy, Management and Evaluation (IHPME), University of Toronto; Institute for Clinical Evaluative Sciences

Nicole Mittmann, MSc PhD

Cancer Care Ontario, Sunnybrook Health Sciences Centre

Jeffrey S. Hoch, MA PhD

1  
2  
3 University of California Davis; Institute for Clinical Evaluative Sciences  
4  
5  
6

7  
8 Kelvin K.W. Chan, MD MSc FRCPC  
9

10 Canadian Centre for Applied Research in Cancer Control (ARCC), Cancer Care Ontario;  
11  
12 Sunnybrook Health Sciences Centre  
13  
14  
15

16  
17  
18 Stuart Peacock, MSc DPhil  
19

20 Canadian Centre for Applied Research in Cancer Control (ARCC), British Columbia Cancer  
21  
22 Agency; University of British Columbia; Simon Fraser University  
23  
24  
25

26  
27 **Correspondence to:**  
28

29 Claire de Oliveira  
30

31 Independent Scientist/Health Economist  
32  
33

34  
35  
36 Centre for Addiction and Mental Health  
37

38 Institute for Mental Health Policy Research  
39

40  
41 33 Russell Street, Room T414  
42

43 Toronto, Ontario  
44

45 M5S 2S1 Canada  
46  
47  
48

49  
50 Telephone: 416-535-8501 extension 36098  
51

52 Fax: 416-595-6899  
53  
54

55 E-mail: [claire.deoliveira@camh.ca](mailto:claire.deoliveira@camh.ca) (can be published)  
56  
57  
58

**Funding:**

This study received support from the Canadian Centre for Applied Research in Cancer Control (ARCC), which is funded by the Canadian Cancer Society. Dr. Peacock is supported by the Leslie Diamond Chair in Cancer Survivorship at the Faculty of Health Sciences, Simon Fraser University. Dr. Krahn is supported by the F. Norman Hughes Chair in Pharmacoeconomics at the Faculty of Pharmacy, University of Toronto.

**Disclaimer:**

This study was supported by the Institute for Clinical Evaluative Sciences (ICES), which is funded by an annual grant from the Ontario Ministry of Health and Long-Term Care (MOHLTC). The opinions, results, and conclusions reported in this article are those of the authors and are independent from the funding sources. No endorsement by ICES or the Ontario MOHLTC is intended or should be inferred. Parts of this material are based on data and information compiled and provided by the Canadian Institute for Health Information (CIHI). However, the analyses, conclusions, opinions, and statements expressed herein are those of the authors, and not necessarily those of CIHI.

**Competing interests:**

None declared.

**Word count:**

2,859

## Abstract

**Background:** Resource and cost issues are a growing concern in healthcare. Thus, it is important to have an accurate estimate of the economic burden of care. Previous work has estimated the economic burden of cancer care for Canada; however, there is some concern this estimate is too low. The objective of this analysis was to provide a comprehensive, revised estimate of this burden.

**Methods:** We undertook a case-control prevalence-based direct cost approach and estimated cancer costs for each year from 2005 to 2012 to compare with and update previous work. Patient-level administrative healthcare data from Ontario were used to correctly attribute healthcare costs to cancer. We employed the net cost method to account for costs directly and indirectly related to cancer and its sequelae. Using average patient-level cost estimates from Ontario, we applied proportions from national health expenditures data to obtain the economic burden of cancer care for Canada. All costs were adjusted to 2015 Canadian dollars.

**Results:** Our cost estimates were generally larger than those previously published, due to the inclusion of costs of chemotherapy, radiation therapy and other costs. Costs of cancer care rose steadily over our analysis period, from \$2.9 billion in 2005 to roughly \$7.5 billion in 2012, mostly due to the increase in costs of hospital-based care.

**Interpretation:** The existing estimates of the economic burden of cancer care for Canada are too low. Our revised cost estimates provide decision makers with a more accurate understanding of the total economic burden of cancer care in Canada.

## Background

Cancer and related costs are rising at a fast pace.<sup>1</sup> Those who fund and organize cancer care struggle to provide patients with the latest therapies, given limited financial resources. Due to the large economic burden of cancer, it is important to have accurate cost estimates.<sup>2</sup> Cost-of-illness studies can help translate the adverse effects of diseases into dollars, a useful metric for decision makers. These estimates can be used to help set priorities for treatments and aid in the allocation of scarce resources within the healthcare sector. However, few studies have attempted to estimate the cost of cancer for Canada.

*The Economic Burden of Illness in Canada (EBIC) 2005–2008* report is the only comprehensive Canadian cost-of-illness study,<sup>3</sup> which provides comparable estimates for direct (e.g., medical expenditures) and indirect (e.g., lost productivity) costs for all major illness categories, including cancer. This analysis attributed healthcare expenditures to particular conditions by applying estimates of utilization patterns from various sources to aggregate healthcare spending data by expenditure category: hospital care, physician care, and public and private drugs. Other direct healthcare expenditures (e.g., other professionals, capital, public health and other health spending) were also included but could not be attributed to diagnostic and demographic categories. While all expenditures directly associated with cancer were captured, expenditures that were indirectly related were not assigned to the disease. As such, the EBIC report underestimates the actual burden of cancer care. The purpose of this study was to both revise the estimates of the EBIC report and provide more recent estimates of the burden of cancer care for Canada using a more comprehensive approach, which better captures the direct costs of cancer care.

## Methods

### *Setting*

We undertook a comprehensive approach to estimate the economic burden of cancer care for Canada using existing cancer prevalence rates, Ontario patient-level cost data and national expenditure data. For comparability with prior work, we examined two analysis periods: 2005-2008 (to provide more accurate revised estimates) and 2009-2012 (to provide more recent estimates).

### *Study design*

We employed a case-control prevalence-based direct cost approach to estimate costs for each year of our analysis periods. We undertook a 10-year person-based prevalence approach to define our cohort, which was roughly in line with Statistics Canada's cancer prevalence reports.<sup>4</sup> We estimated total and per patient net costs of cancer care for Ontario, and extrapolated these to the rest of Canada using relative provincial/territorial expenditures obtained from the National Health Expenditure Database (NHEX).<sup>5</sup>

### *Data sources*

Cancer prevalence rates were obtained from Statistics Canada and the Canadian Cancer Society. We used patient-level data from Ontario, Canada's largest province (~ 14 million people), to estimate direct costs, from the perspective of the third-party payer (ministry of health), for each year of our analysis. These data were accessed through the Institute for Clinical Evaluative Sciences (ICES), which houses comprehensive, linkable healthcare records for Ontario. Table 1

1  
2  
3 provides a list of the datasets used in this study. A full description of each dataset can be found  
4  
5 elsewhere.<sup>6</sup> In addition, we used the NHEX to obtain provincial/territorial expenditures by  
6  
7 healthcare category.<sup>5</sup>  
8  
9

### 10 11 12 *Cancer prevalence in Canada*

13  
14  
15 Person-based cancer prevalence rates were not available by province/territory; rates by sex were  
16  
17 available for Canada for 2005, 2007 and 2009 only.<sup>7-9</sup> Based on existing data, we used linear  
18  
19 interpolation and extrapolation to obtain prevalence rates by sex for 2006 and 2008, and 2010-  
20  
21 2012, respectively. We used existing 10-year tumour-based prevalence by sex and age groups<sup>9</sup> to  
22  
23 infer the corresponding person-based cancer prevalence rates. To estimate the number of people  
24  
25 living with cancer across the country, we applied the Canadian prevalence rate in each  
26  
27 province/territory and multiplied our sex and age group prevalence estimates by the respective  
28  
29 population groups of each province/territory obtained from the NHEX.<sup>5</sup> (Further details can be  
30  
31 found in the Appendix).  
32  
33  
34  
35  
36  
37  
38

### 39 *Patients*

40  
41 We used the Ontario Cancer Registry to select all patients with cancer and in remission (cases)  
42  
43 who were diagnosed in the 10 years up to and including the year of analysis (see Table A2 in the  
44  
45 Appendix for the list of neoplasm codes included). We selected non-cancer patients (controls)  
46  
47 from the Registered Persons Database, a population-based registry in Ontario. We matched cases  
48  
49 to controls on age +/- 1 year; sex; and comorbidity (measured by Aggregated Diagnosis Groups  
50  
51 from the Johns Hopkins Adjusted Clinical Groups software,<sup>10</sup> excluding the malignant neoplasm  
52  
53 cluster) at the start of each analysis period (2005 and 2009). This ensured that controls remained  
54  
55  
56  
57  
58  
59  
60

1  
2  
3 representative of cases throughout each analysis period. Cases that died at any time during each  
4  
5 analysis period were matched to controls that also died during the same year.  
6  
7

### 8 9 10 *Patient-level cost estimation*

11  
12 We estimated all costs related to initial treatment, ongoing treatment, remission and palliative  
13  
14 care for cancer patients. Patient-level costs were obtained using a cost algorithm available at  
15  
16 ICES,<sup>6</sup> which includes the cost of inpatient hospitalizations (acute and psychiatric); emergency  
17  
18 department visits, same-day surgery and other ambulatory care; other institution-based care, such  
19  
20 as rehabilitation, complex continuing care and long-term care; physician-related visits; outpatient  
21  
22 prescription drugs (covered under the public provincial drug plan);<sup>11</sup> non-physician billings  
23  
24 covered under the Ontario Health Insurance Plan (e.g. physiotherapists, optometrists,  
25  
26 chiropractors, etc.); diagnostic tests; home care, and assistive devices. For comparability with  
27  
28 prior work,<sup>3</sup> we assigned these costs to three categories: hospital care (which included hospital  
29  
30 and other institution-based care), physician care, and drugs. We created a fourth category, ‘other  
31  
32 care’, not included in prior work, which included the remaining healthcare services (non-  
33  
34 physician billings, diagnostic tests, home care and assistive devices).  
35  
36  
37  
38  
39  
40  
41  
42

43  
44 Chemotherapy and radiation therapy costs were also not included in previous work. We  
45  
46 estimated these costs and reported them separately and jointly with hospital care. To estimate the  
47  
48 cost of parenteral and oral chemotherapy, we used the number of doses and unit costs available  
49  
50 in the New Drug Funding Program database, from Cancer Care Ontario, and the Ontario Drug  
51  
52 Benefit claims database, respectively. For radiation therapy, we used the unit measure provided  
53  
54 by the National Hospital Productivity Improvement Program codes in the Activity Level  
55  
56  
57  
58  
59  
60



1  
2  
3 Reporting database, from Cancer Care Ontario, and multiplied each unit by a unit cost estimate  
4  
5 obtained from the literature.<sup>12</sup>  
6  
7

8  
9  
10 Data on some health services were missing for some months/years of our analysis, namely for  
11  
12 psychiatric inpatient hospitalizations for the first 9 months of 2005; other ambulatory care  
13  
14 (cancer clinic and dialysis visits) for 2005; and assistive devices from August 2010 onwards. To  
15  
16 address this, we extrapolated missing cost estimates for other ambulatory care and estimated  
17  
18 annualized cost estimates for psychiatric inpatient hospitalizations and assistive devices based on  
19  
20 existing data.  
21  
22  
23

### 24 25 26 *Statistical analyses*

27  
28 All analyses were undertaken by sex (male and female) and age groups (0–14 years; 15–34  
29  
30 years; 35–54 years; 55–64 years; 65–74 years; and 75 years and older), as defined in previous  
31  
32 work.  
33  
34  
35

### 36 37 38 *Patient-level net costs*

39  
40 We calculated gross per patient costs for each cost category, sex and age group. To estimate the  
41  
42 “true” costs due to cancer, we employed a ‘net cost’ approach,<sup>13-14</sup> which has been employed and  
43  
44 validated in previous work.<sup>15-17</sup> This method consists of estimating the total gross cost of all  
45  
46 healthcare used to treat cases and controls by matching them on variables believed to influence  
47  
48 healthcare utilization. Mathematically,  $NC = C^P - C^C$ , where NC is net cost, C is gross cost, and  
49  
50 superscripts *P* and *C* denote patients (cases) and controls, respectively. The corresponding  
51  
52 variance was defined as  $Var(NC) = Var(C^P) + Var(C^C)$ , where the covariance of costs for  
53  
54  
55  
56  
57  
58  
59  
60

1  
2  
3 patients (cases) and controls was assumed to be independent, given the conditional independence  
4  
5 of the demographic variables and comorbidity after matching. In addition, 95% confidence  
6  
7 intervals (CIs) were produced for each cost estimate.  
8  
9

### 10 11 12 *National-level extrapolated costs*

13  
14 Data from the NHEX were used to create extrapolation factors to reflect differences between  
15  
16 Ontario and each province/territory in terms of relative expenditures for each cost category.  
17  
18 (Further details on the methodology can be found in the Appendix.) Extrapolation factors for  
19  
20 ‘other care’ were based on expenditure data for ‘other professionals’, as this was the category  
21  
22 that best matched the mix of healthcare services included in the ‘other expenditures’ category.  
23  
24 We used hospital care extrapolation factors for chemotherapy and radiation therapy. Missing  
25  
26 data for some provinces and analysis periods were replaced with similar regional provincial data  
27  
28 for the same year and cost category, where required.  
29  
30  
31  
32  
33  
34  
35  
36  
37  
38  
39  
40  
41  
42

43 All cost estimates were expressed in constant 2015 dollars using the provincial healthcare  
44  
45 component of the Consumer Price Index produced by Statistics Canada.<sup>18</sup>  
46  
47  
48  
49  
50  
51  
52

### 53 *Ethics approval*

54  
55 This study was approved by the Research Ethics Board at Sunnybrook Health Sciences Centre,  
56  
57 Toronto.  
58  
59  
60

## 61 **Results**

### 62 *Patients*

1  
2  
3 We found non-cancer matches for 96% of our cases, overall, in both analysis periods. Over 99%  
4  
5 of patients who were alive during each period were matched; for deaths, just over 80% were  
6  
7 matched. There were no significant differences post-matching between cases and controls on  
8  
9 age, sex or comorbidity in either analysis period or cohort. (See Tables A3-A5 in the Appendix  
10  
11 for details.)  
12  
13  
14  
15  
16  
17

### 18 *Patient-level net costs*

19  
20 Tables 2 and 3 provide total net cost estimates in constant 2015 dollars (million) by cost  
21  
22 category, and respective confidence intervals, for 2005–2008 and 2009–2012, respectively.  
23  
24

25 (Corresponding total gross cost estimates can be found in Tables A6 and A7 in the Appendix.)  
26

27 Total net costs increased over both analysis periods from \$1,024.5 million (95% CI [\$997.2,  
28  
29 \$1,051.9]) in 2005 to \$2,073.0 million (95% CI [\$2,034.3, \$2,111.7]) in 2008 and from \$1,825.4  
30  
31 million (95% CI [\$1,785.9, \$1,864.9]) in 2009 to \$2,610.4 million (95% CI [\$2,568.5, \$2,652.2])  
32  
33 in 2012. Subcategories of net costs, and respective confidence intervals, were negative for some  
34  
35 years due to higher costs among matched controls.  
36  
37  
38  
39  
40

### 41 *National-level extrapolated costs*

42  
43 Figure 1 depicts total (net) public expenditures on cancer care by cost category and year for  
44  
45 Canada, in constant 2015 dollars (millions). Total net expenditures rose substantively over each  
46  
47 study period, from \$2.9 billion in 2005 to roughly \$7.5 billion in 2012, mainly driven by  
48  
49 hospital-based care. (See Table A8 in the Appendix for total (net) public expenditures by cost  
50  
51 category, sex and year for Canada.) Chemotherapy and radiation therapy expenditures saw the  
52  
53  
54  
55  
56  
57  
58  
59  
60

1  
2  
3 largest increases over the study period (by a factor of 3 and almost 4 times, respectively, from  
4  
5 2005 to 2012) (Figure 2).  
6  
7

8  
9  
10 Table 4 provides our revised estimates for each expenditure category (including our revised  
11 hospital care and other care expenditures), from 2005 to 2008, alongside the EBIC report  
12 estimates, in constant 2015 dollars. Figure 2 illustrates these comparisons for 2008. The estimate  
13 in the EBIC report in 2008 was higher (\$4.2 billion) than our net expenditure estimate (\$3.6  
14 billion), excluding chemotherapy, radiation therapy and other care); however, our estimate of  
15 hospital care was slightly higher than that in the EBIC report (\$2.6 billion versus \$2.5 billion).  
16  
17 When we included chemotherapy and radiation therapy, our total estimate increased to \$4.5  
18 billion; it increased further to \$4.9 billion when we included other care.  
19  
20  
21  
22  
23  
24  
25  
26  
27  
28  
29  
30  
31

### 32 **Interpretation**

33  
34 We found that the economic burden of cancer care in Canada more than doubled over our entire  
35 analysis period, rising from \$2.9 billion in 2005 to \$7.5 billion in 2012. Hospital care  
36 expenditures made up the largest portion, followed by physician care and drug expenditures;  
37  
38 other expenditures were of similar magnitude to that of drugs and thus not negligible.  
39  
40  
41  
42  
43  
44  
45

46 Our estimates were only comparable with those reported in the EBIC report for our first analysis  
47 period, 2005-2008. With the exception of 2005 and 2006, we found higher total expenditures in  
48 our analysis by 9% and 18% in 2007 and 2008, respectively. Our estimates of hospital care  
49 expenditures were lower than those in the EBIC report, with the exception of 2008. However,  
50  
51 when hospital care was expanded to include chemotherapy and radiation therapy, our estimate  
52  
53  
54  
55  
56  
57  
58  
59  
60

1  
2  
3 was higher for all years except 2005. Our findings suggest that the figures in the EBIC report are  
4 likely underestimates of the actual expenditures of hospital care for cancer patients.  
5  
6  
7  
8  
9

10 Our physician care expenditures were lower than those in the EBIC report for all years. The  
11 EBIC report attributed physician care expenditures to specific conditions by applying patterns  
12 from Manitoba's publicly available fee-for-service data to the total physician expenditure data in  
13 the NHEX. Costs may have been misattributed to cancer if patterns found in Manitoba's fee-for-  
14 service system did not apply to other provinces and payment systems. Our revised estimates of  
15 physician care were based on costs observed in Ontario, where the share of physicians paid fee-  
16 for-service is lower than in Québec and the western provinces for most years of the full study  
17 period.<sup>19</sup> Hence, our estimates of physician care expenditures may be biased downward.  
18  
19  
20  
21  
22  
23  
24  
25  
26  
27  
28  
29  
30  
31

32 We could not compare our drug expenditures with those from the EBIC report. Our estimates  
33 included costs of outpatient prescription drugs and dispensing fees covered under public  
34 provincial/territorial drug plans only; those in the EBIC report included costs of outpatient  
35 prescription drugs covered under both public *and* private insurance plans and fees. Thus, our  
36 estimates are a portion of those included in the EBIC report.  
37  
38  
39  
40  
41  
42  
43  
44  
45

46 When we included *all* relevant costs, such as costs of home care and other health services (likely  
47 non-attributable and thus not explicitly included in the EBIC report), our total cost estimates  
48 were larger than those in the EBIC report for every year, except 2005 and 2006. Thus, when all  
49 relevant costs are considered, the true cost of caring for cancer patients is likely higher than the  
50 estimates currently available.  
51  
52  
53  
54  
55  
56  
57  
58  
59  
60

1  
2  
3  
4  
5  
6 Our analysis made use of rich administrative healthcare data and a large population-based  
7  
8 prevalence sample of children and adults in Ontario. This enabled us to attribute all direct costs  
9  
10 to patients and cost categories, in contrast with previous work. Our case-control methodology  
11  
12 enabled us to estimate costs directly *and* indirectly related to cancer and its sequelae, a more  
13  
14 accurate measure of all relevant costs of cancer care. It is vital to have accurate cost estimates.  
15  
16 This information is important to stakeholders, such as ministries/departments of health and the  
17  
18 Canadian Partnership Against Cancer, for example, who are interested in understanding the cost  
19  
20 of treating patients with cancer. These estimates may be used to inform decisions regarding  
21  
22 healthcare resource allocation and to set future healthcare budgets. In particular, chemotherapy  
23  
24 cost estimates will be of interest to members of the Canadian Association of Provincial Cancer  
25  
26 Agencies and provincial ministries/departments of health as the provision of cancer-related drugs  
27  
28 has direct impact on their budgets. These data may also be useful to the pan-Canadian  
29  
30 Pharmaceutical Alliance to inform future drug price negotiations.  
31  
32  
33  
34  
35  
36  
37  
38

### 39 ***Limitations***

40  
41 Our method to calculate 10-year person-based prevalence differed slightly from the one used by  
42  
43 Statistics Canada. Prevalence rates were missing for some years of our study, which required  
44  
45 extrapolation. Prevalence estimates by province/territory were not available for any year of our  
46  
47 analysis; thus, we assumed the same prevalence rate across all jurisdictions. We also made  
48  
49 several assumptions to extrapolate person-based prevalence from tumour-based prevalence for  
50  
51 each sex/age group.  
52  
53  
54  
55  
56  
57  
58  
59  
60

1  
2  
3 Our patient-level data were limited to costs paid by the Ontario Ministry of Health and Long-  
4 term Care, which includes roughly 92% of government-related costs of health services.<sup>20</sup> We  
5 were only able to capture third-party *public* costs for outpatient *prescription* drugs and  
6 dispensing fees; in Ontario this includes patients 65 and older and special cases (e.g. individuals  
7 on social assistance).<sup>11</sup> Data on outpatient prescription drugs paid by private health insurance  
8 plans, non-prescription drugs, markups and taxes were not available. There were also a few  
9 instances where cost data were missing, which required imputation.  
10  
11  
12  
13  
14  
15  
16  
17  
18  
19

20  
21  
22 We were not able to find a match for all cancer cases; this reduced the sample of the net cost  
23 analysis and may have biased our estimates. Along with age and sex, we matched on  
24 comorbidity, which may have excluded the higher risk of developing comorbid conditions  
25 among cancer patients. Thus, our estimates are likely conservative.  
26  
27  
28  
29  
30  
31  
32  
33

34 To extrapolate the Ontario cost to other Canadian provinces/territories, we assumed that relative  
35 spending for cancer patients (in each province/territory versus Ontario) reflected the relative total  
36 spending by provincial/territorial government payers for each healthcare cost category. Given the  
37 lack of spending estimates for chemotherapy and radiation therapy, we used relative hospital care  
38 spending. Data from the NHEX were missing for some categories and years for some  
39 jurisdictions, which required making some assumptions to obtain imputed values. Furthermore,  
40 we were not able to find an equivalent cost category in the NHEX for “other expenditures”.  
41  
42  
43  
44  
45  
46  
47  
48  
49  
50  
51  
52  
53  
54  
55  
56  
57  
58  
59  
60

1  
2  
3 Finally, unlike the EBIC report, we estimated the direct costs incurred by the public third-party  
4 payer only; we did not have the data required to estimate indirect costs, such as lost productivity  
5  
6 associated with cancer.  
7  
8  
9

### 10 11 12 *Conclusion*

13  
14  
15 Our analysis suggests that the economic burden of cancer care in Canada is larger than the  
16 existing estimate. Hospital care made up the largest and fastest growing share of the overall  
17 burden. In particular, chemotherapy and radiation therapy expenditures grew the most.  
18  
19 Nevertheless, given our assumptions and data limitations, our results are likely an underestimate  
20 of the true economic burden. Future work is required to estimate the full cost of both  
21 prescription and non-prescription drugs covered by public and private third-party payers. Given  
22 that this analysis was based on cost estimates for Ontario only, the accuracy of national estimates  
23 would be improved by using province-specific cost data where possible. Further research is also  
24 required to understand how the economic burden of cancer compares to that of other diseases.  
25  
26  
27  
28  
29  
30  
31  
32  
33  
34  
35  
36  
37  
38  
39  
40  
41  
42  
43  
44  
45  
46  
47  
48  
49  
50  
51  
52  
53  
54  
55  
56  
57  
58  
59  
60



## References

1. Canadian Institute for Health Information, National Health Expenditure Trends, 1975 to 2011 (Ottawa, Ont.: CIHI, 2011).
2. Mittmann N, de Oliveira C. Importance of cost estimates and cost studies. *Curr Oncol* 2016;23(1):S6.
3. Public Health Agency of Canada. 2014. Economic Burden of Illness in Canada, 2005–2008. Available online: [www.phac-aspc.gc.ca/ebic-femc/index-eng.php](http://www.phac-aspc.gc.ca/ebic-femc/index-eng.php) (Accessed: March 29, 2016).
4. Ellison, LF, Wilkins K. Canadian trends in cancer prevalence. Statistics Canada, Catalogue no. 82-003-XPE • Health Reports, Vol. 23, no. 1, March 2012.
5. Canadian Institute for Health Information. 2016. National Health Expenditures Database (NHEX) Metadata. Available online: <https://www.cihi.ca/en/spending-and-health-workforce/spending/health-spending-data/national-health-expenditure-database> (Accessed: March 30, 2016).
6. Wodchis WP, Bushmeneva K, Nikitovic M, McKillop I. Guidelines on Person-Level Costing Using Administrative Databases in Ontario. Working Paper Series. Vol 1. Toronto: Health System Performance Research Network; 2013.
7. Canadian Cancer Society's Steering Committee on Cancer Statistics. 2009. Canadian Cancer Statistics 2009. Toronto, ON: Canadian Cancer Society; 2009. Available online: <http://www.cancer.ca/en/cancer-information/cancer-101/canadian-cancer-statistics-publication/past-editions-canadian-cancer-statistics/?region=on> (Accessed: March 29, 2016).

- 1  
2  
3  
4  
5  
6  
7  
8  
9  
10  
11  
12  
13  
14  
15  
16  
17  
18  
19  
20  
21  
22  
23  
24  
25  
26  
27  
28  
29  
30  
31  
32  
33  
34  
35  
36  
37  
38  
39  
40  
41  
42  
43  
44  
45  
46  
47  
48  
49  
50  
51  
52  
53  
54  
55  
56  
57  
58  
59  
60
8. Canadian Cancer Society's Steering Committee on Cancer Statistics. 2011. Canadian Cancer Statistics 2011. Toronto, ON: Canadian Cancer Society; 2011. Available online: <http://www.cancer.ca/en/cancer-information/cancer-101/canadian-cancer-statistics-publication/past-editions-canadian-cancer-statistics/?region=on> (Accessed: March 29, 2016).
  9. Canadian Cancer Society's Advisory Committee on Cancer Statistics. 2014. Canadian Cancer Statistics 2014. Toronto, ON: Canadian Cancer Society; 2014. Available online: <http://www.cancer.ca/en/cancer-information/cancer-101/canadian-cancer-statistics-publication/past-editions-canadian-cancer-statistics/?region=on> (Accessed: March 29, 2016).
  10. Johns Hopkins. 2016. The Johns Hopkins ACG System. Available online: <http://acg.jhsph.org/index.php/the-acg-system-advantage/acgs> (accessed: March 30, 2016).
  11. Ministry of Health and Long Term Care (MOHLTC). 2016. The Ontario Drug Benefit (ODB) Program. Available online: <http://www.health.gov.on.ca/en/public/programs/drugs/programs/odb/odb.aspx> (Accessed: March 30, 2016).
  12. Earle C, Coyle D, Smith A, et al. The cost of radiotherapy at an Ontario Regional cancer centre: a reevaluation. *Crit Rev Oncol Hematol* 1999;32:87-93.
  13. Taplin SH, Barlow W, Urban N, et al. Stage, age, comorbidity, and direct costs of colon, prostate, and breast cancer care. *J Natl Cancer Inst* 1995;87(6):417-426.

- 1  
2  
3  
4  
5  
6  
7  
8  
9  
10  
11  
12  
13  
14  
15  
16  
17  
18  
19  
20  
21  
22  
23  
24  
25  
26  
27  
28  
29  
30  
31  
32  
33  
34  
35  
36  
37  
38  
39  
40  
41  
42  
43  
44  
45  
46  
47  
48  
49  
50  
51  
52  
53  
54  
55  
56  
57  
58  
59  
60
14. Brown ML, Riley GF, Potosky AL, et al. Obtaining long-term disease specific costs of care: application to Medicare enrollees diagnosed with colorectal cancer. *Med Care* 1999;37(12):1249-1259.
  15. Yabroff KR, Lamont EB, Mariotto A, et al. Cost of care for elderly cancer patients in the United States. *J Natl Cancer Inst* 2008;100:630-41.
  16. Krahn MD, Zagorski B, Laporte A, et al. Healthcare costs associated with prostate cancer: estimates from a population-based study. *BJU Int* 2010;105:338-46.
  17. de Oliveira C, Pataky R, Bremner K, Rangreg J, Chan K, Cheung W, Hoch J, Peacock S, Krahn M. Phase-specific and lifetime costs of cancer care in Ontario. *BMC Cancer* 2016;16:809.
  18. Statistics Canada. 2016. Consumer Price Index, health and personal care, by province. Available online: <http://www.statcan.gc.ca/tables-tableaux/sum-som/l01/cst01/econ161a-eng.htm> (Accessed: March 30, 2016).
  19. Canadian Institute for Health Information. 2016b. National Physician Database (NPDB) Metadata. Available online: <https://www.cihi.ca/en/spending-and-health-workforce/health-workforce/national-physician-database-npdb-metadata> (Accessed: March 30, 2016).
  20. Wodchis WP, Austin PC, Henry DA. A 3-year study of high-cost users of health care. *Can Med Assoc J* 2016;188(3):182-8.

Figure 1 – Total (net) public expenditures on cancer care by cost category and year (2005-2008 and 2009-2012), Canada (constant 2015 \$000,000)

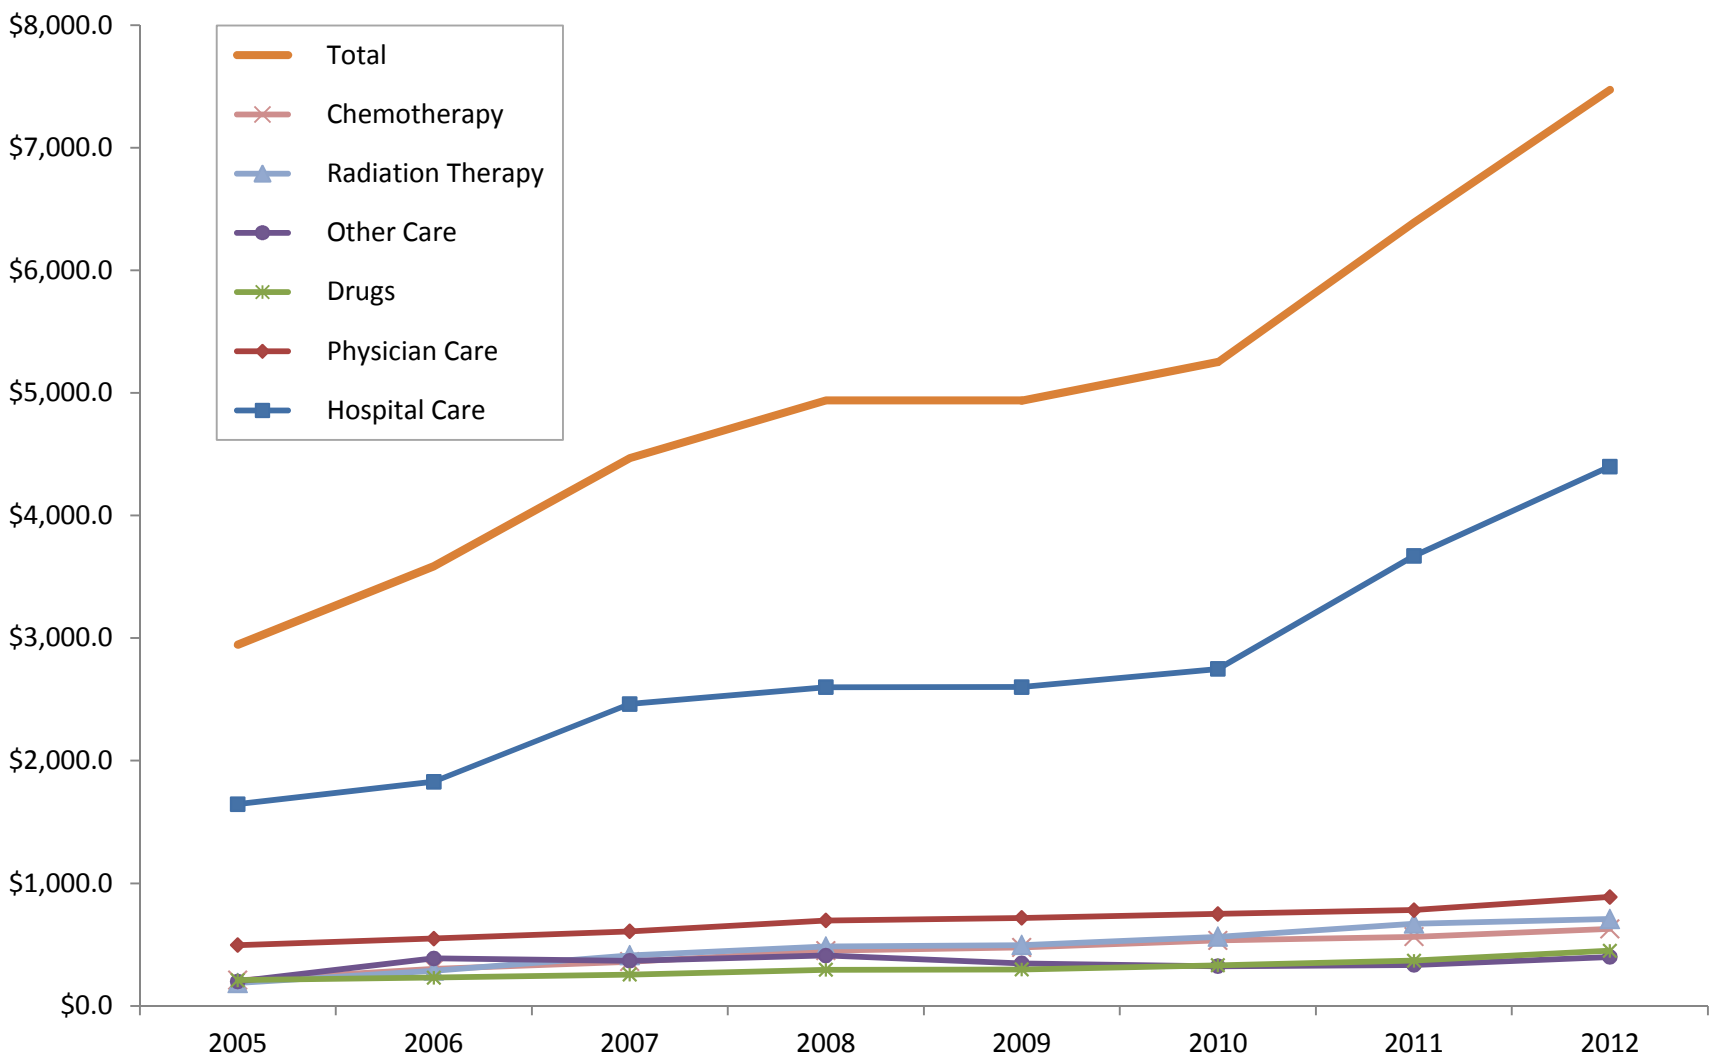

Note: Cases were matched to controls in 2005 and 2009; hence, there is a discontinuity in net costs between 2008 and 2009. 'Other Care' includes non-physician care (including other professional services performed outside the hospital setting), diagnostic testing, home care, and assistive devices.

Source: Costs for Canada were estimated using a combination of purpose-derived estimates of mean net costs of cancer care in Ontario, National Health Expenditures (NHEX) data on relative expenditures by cost category for each province versus Ontario (Table E)<sup>5</sup> and prevalence figures for each province/territory, which were estimated based on data from the Canadian Cancer Society (CCS) and Statistics Canada,<sup>7-9</sup> and NHEX data on population by age, sex and province/territory for 2005–2012.<sup>5</sup>

**Figure 2 – Total (net) public expenditures on radiation therapy and chemotherapy by year (2005-2008 and 2009-2012), Canada (constant 2015 \$000,000)**

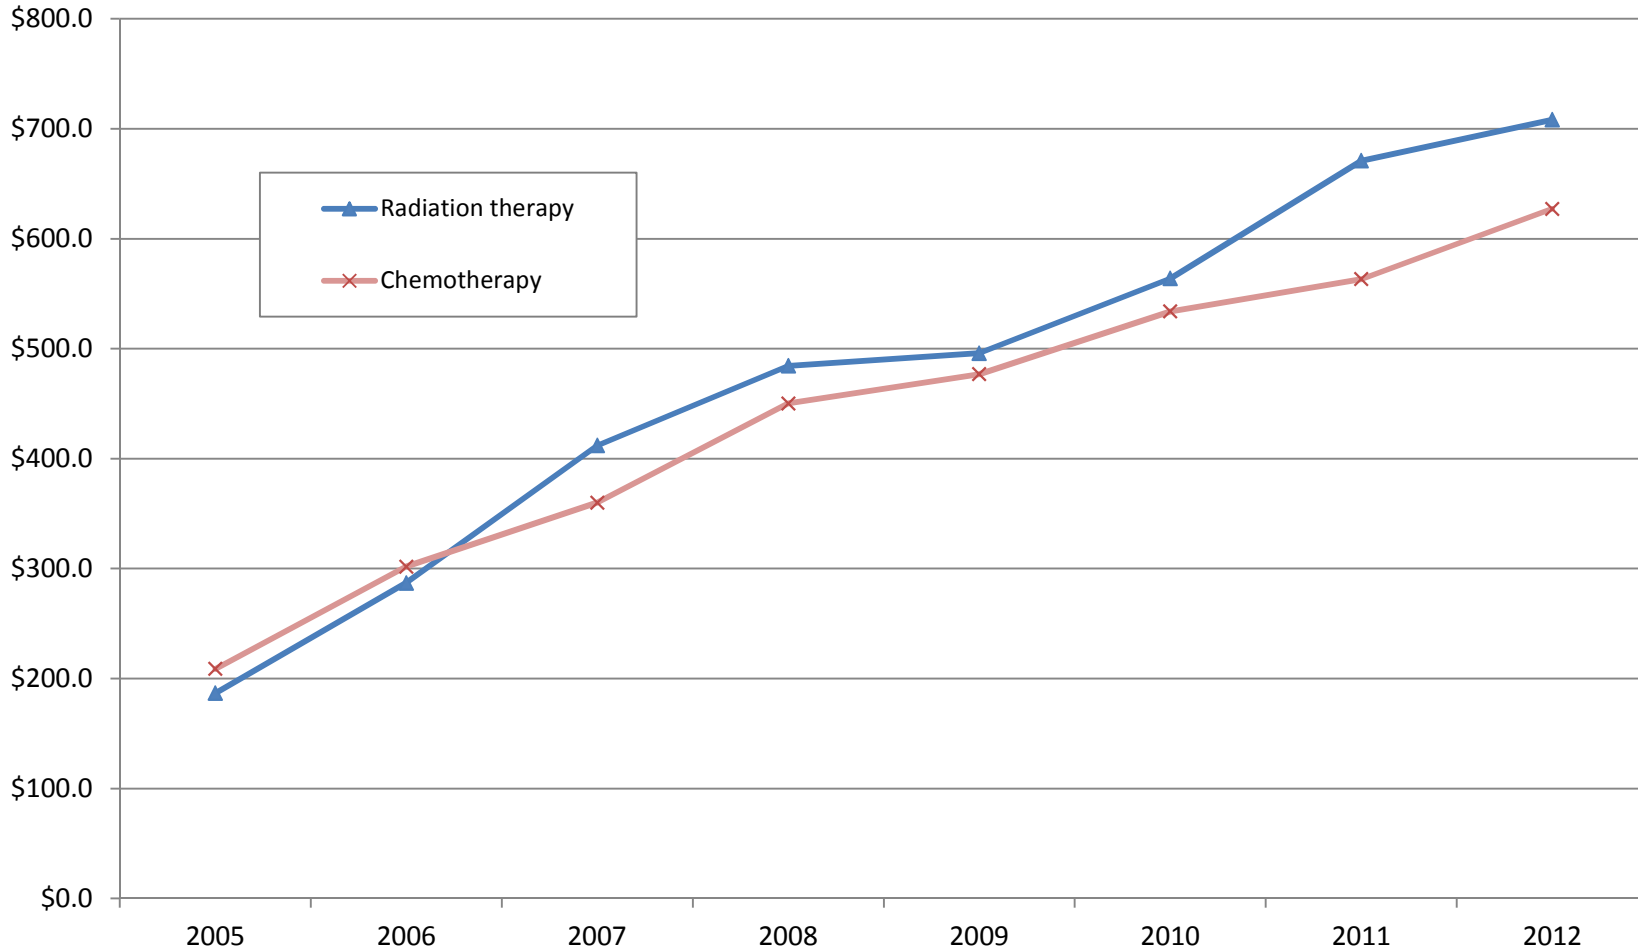

**Note:**

Cases were matched to controls in 2005 and 2009; hence, there is a discontinuity in net costs between 2008 and 2009.

**Source:** Costs for Canada were estimated using a combination of purpose-derived estimates of mean net costs of cancer care in Ontario, National Health Expenditures (NHEX) data on relative expenditures by cost category for each province versus Ontario (Table E),<sup>5</sup> and prevalence figures for each province/territory, which were estimated based on data from the Canadian Cancer Society (CCS) and Statistics Canada,<sup>7-9</sup> and NHEX data on population by age, sex and province/territory for 2005–2012.<sup>5</sup>

**Figure 3 – Total public expenditures on cancer care in Canada, by cost category, 2008 (constant 2015 \$'000,000)**

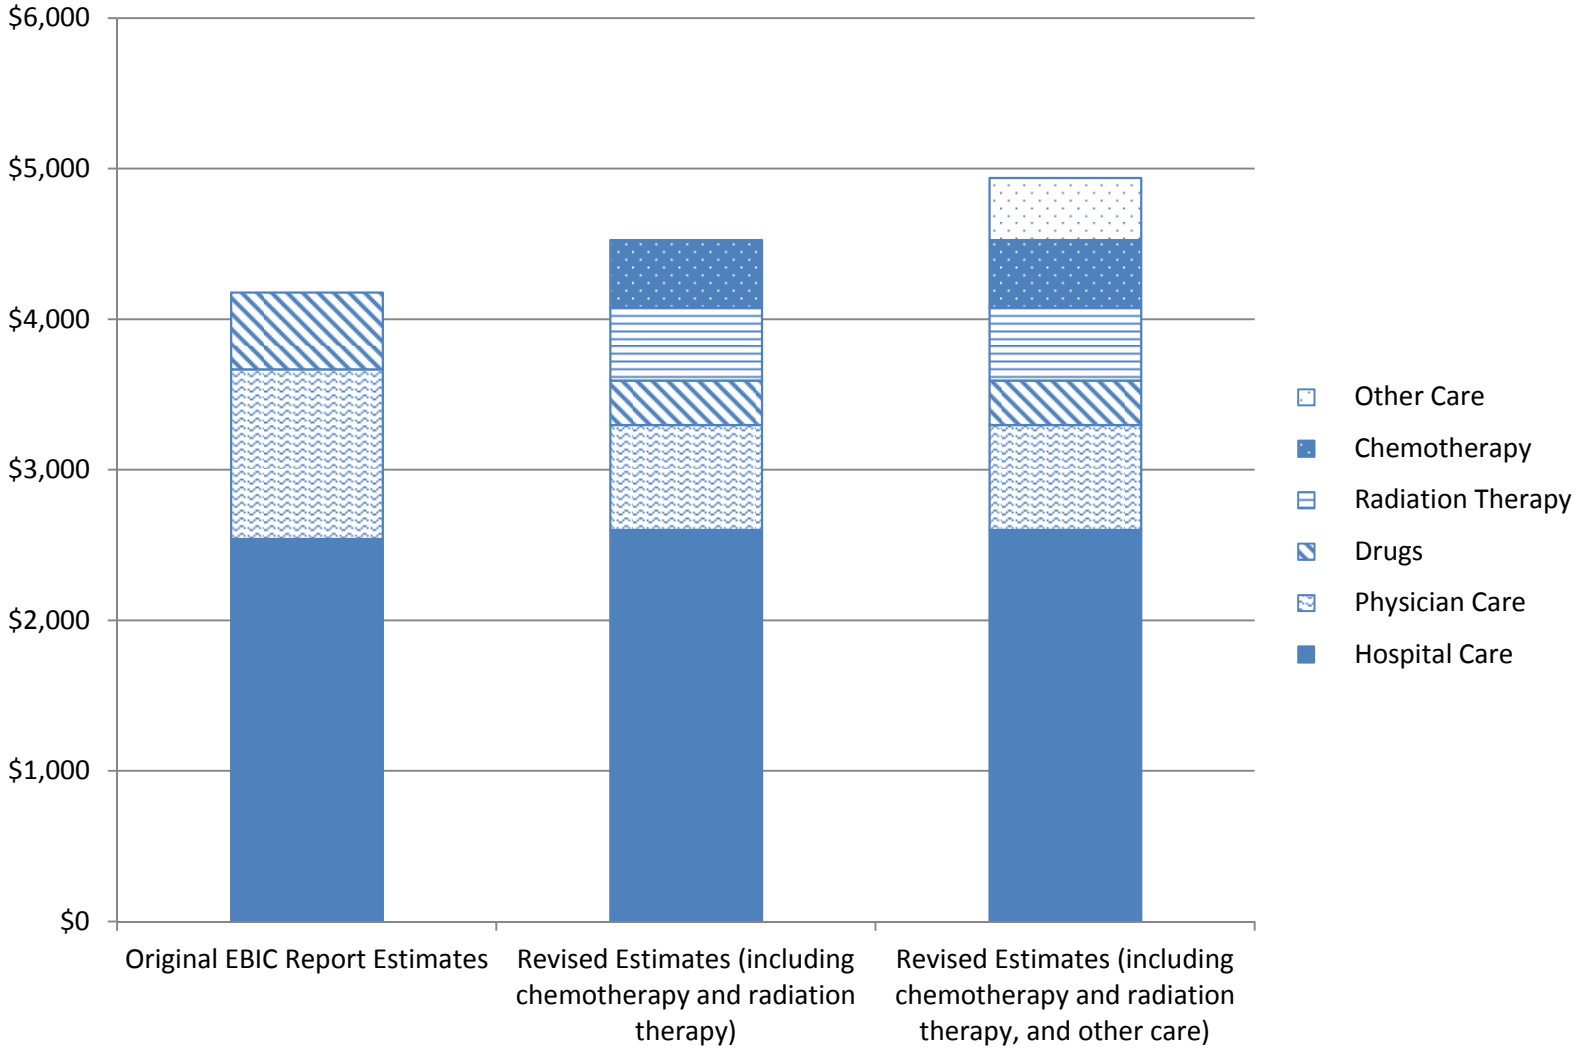

**Note:** 'Drugs' includes expenditures by both public and private insurance plans in the Original EBIC report estimates but includes only public expenditures in the revised estimates. 'Other Care' includes home care, non-physician care (including other professional services performed outside the hospital setting), diagnostic testing, and assistive devices.

**Source:** Economic Burden of Illness in Canada (EBIC) 2005–2008 report;<sup>3</sup> costs for Canada were estimated using a combination of purpose-derived estimates of mean net costs of cancer in Ontario, National Health Expenditures (NHEX) data on relative expenditures by cost category for each province versus Ontario (Table E),<sup>5</sup> and prevalence figures for each province/territory, which we estimated based on data from the Canadian Cancer Society (CCS) and Statistics Canada,<sup>7-9</sup> and NHEX data on population by age, sex and province/territory for 2005–2012.<sup>5</sup>

**Table 1 – Databases available at the Institute for Clinical Evaluative Sciences**

| <b>Databases</b>                                                                    | <b>Years</b>      |
|-------------------------------------------------------------------------------------|-------------------|
| <i>Cancer-specific Databases</i>                                                    |                   |
| Activity Level Reporting Database                                                   | Jan 2007-Dec 2012 |
| New Drug Funding Program Database                                                   | Jan 2005-Dec 2012 |
| Ontario Cancer Registry                                                             | Jan 2005-Dec 2012 |
| <i>Health Services Databases</i>                                                    |                   |
| Assistive Devices Program Database                                                  | Jan 2005-Aug 2010 |
| Canadian Institute for Health Information-Discharge Abstract Database               | Jan 2005-Dec 2012 |
| Canadian Institute for Health Information-National Ambulatory Care Reporting System | Jan 2005-Dec 2012 |
| Continuing Care Reporting System                                                    | Jan 2005-Dec 2012 |
| Home Care Database                                                                  | Apr 2005-Dec 2012 |
| National Rehabilitation Reporting System                                            | Jan 2005-Dec 2012 |
| Ontario Drug Benefit Claims Database                                                | Jan 2005-Dec 2012 |
| Ontario Health Insurance Plan Claims Database                                       | Jan 2005-Dec 2012 |
| Ontario Home Care Administrative System                                             | Jan 2005-Mar 2005 |
| Ontario Mental Health Reporting System                                              | Oct 2005-Dec 2012 |
| <i>Population Registry</i>                                                          |                   |
| Ontario Registered Persons Database                                                 | Jan 2005-Dec 2012 |

**Table 2 – Total net cost<sup>1</sup> and 95% confidence intervals (CI), by cost category for patients with malignant neoplasms diagnosed in the past 10 years in Ontario, 2005–2008 (constant 2015 \$000,000)**

| Cost Category:                                   | 2005      |              |              | 2006      |              |              | 2007      |              |              | 2008      |              |              |
|--------------------------------------------------|-----------|--------------|--------------|-----------|--------------|--------------|-----------|--------------|--------------|-----------|--------------|--------------|
|                                                  | Net Cost  | Lower 95% CI | Upper 95% CI | Net Cost  | Lower 95% CI | Upper 95% CI | Net Cost  | Lower 95% CI | Upper 95% CI | Net Cost  | Lower 95% CI | Upper 95% CI |
| <b>Hospital Care</b>                             |           |              |              |           |              |              |           |              |              |           |              |              |
| Acute inpatient hospital care                    | \$500.5   | \$484.2      | \$516.8      | \$550.3   | \$532.1      | \$568.5      | \$630.3   | \$607.5      | \$653.0      | \$665.5   | \$642.6      | \$688.5      |
| Ambulatory hospital care                         |           |              |              |           |              |              |           |              |              |           |              |              |
| Day surgery                                      | \$39.2    | \$38.1       | \$40.3       | \$39.5    | \$38.3       | \$40.7       | \$43.6    | \$42.3       | \$45.0       | \$46.0    | \$44.6       | \$47.4       |
| Emergency department visits                      | \$7.7     | \$6.9        | \$8.6        | \$9.2     | \$8.3        | \$10.1       | \$10.2    | \$9.2        | \$11.1       | \$13.2    | \$12.3       | \$14.2       |
| Cancer clinics <sup>2</sup>                      | n/a       | n/a          | n/a          | \$357.3   | \$353.0      | \$361.6      | \$517.3   | \$511.9      | \$522.8      | \$498.4   | \$492.9      | \$503.8      |
| Dialysis clinics <sup>2</sup>                    | n/a       | n/a          | n/a          | -\$12.7   | -\$16.7      | -\$8.7       | -\$16.9   | -\$23.4      | -\$10.4      | -\$13.1   | -\$21.5      | -\$4.8       |
| Psychiatric inpatient hospital care <sup>3</sup> | -\$7.8    | -\$9.8       | -\$5.8       | -\$24.7   | -\$29.5      | -\$19.8      | -\$26.4   | -\$32.4      | -\$20.5      | -\$26.3   | -\$32.5      | -\$20.1      |
| Chronic and rehabilitation care                  |           |              |              |           |              |              |           |              |              |           |              |              |
| Complex continuing care                          | -\$7.8    | -\$17.2      | \$1.7        | -\$12.8   | -\$22.5      | -\$3.1       | -\$0.8    | -\$10.5      | \$8.8        | \$5.5     | -\$4.1       | \$15.1       |
| Long-term care                                   | -\$116.8  | -\$124.1     | -\$109.5     | -\$128.3  | -\$135.8     | -\$120.7     | -\$132.5  | -\$140.2     | -\$124.8     | -\$124.3  | -\$132.2     | -\$116.5     |
| Rehabilitation                                   | \$4.4     | \$0.2        | \$8.5        | \$7.4     | \$3.2        | \$11.6       | \$4.5     | \$0.1        | \$8.8        | \$7.2     | \$2.4        | \$12.0       |
| Other hospital care                              |           |              |              |           |              |              |           |              |              |           |              |              |
| Chemotherapy                                     | \$91.7    | \$89.4       | \$94.1       | \$128.6   | \$125.2      | \$132.0      | \$149.9   | \$146.4      | \$153.5      | \$187.3   | \$183.3      | \$191.2      |
| Radiation therapy                                | \$82.3    | \$80.6       | \$84.0       | \$123.7   | \$121.5      | \$125.9      | \$173.4   | \$169.8      | \$177.0      | \$201.5   | \$197.5      | \$205.5      |
| <b>Physician Care</b>                            |           |              |              |           |              |              |           |              |              |           |              |              |
| Fee-for-service                                  | \$202.0   | \$198.1      | \$205.9      | \$219.6   | \$215.6      | \$223.6      | \$242.0   | \$237.1      | \$246.9      | \$273.7   | \$268.2      | \$279.1      |
| Non-fee-for-service                              | \$43.2    | \$42.4       | \$43.9       | \$53.0    | \$52.1       | \$53.9       | \$58.5    | \$57.5       | \$59.5       | \$70.0    | \$68.9       | \$71.1       |
| <b>Drugs<sup>4</sup></b>                         | \$106.1   | \$102.0      | \$110.1      | \$114.4   | \$110.0      | \$118.9      | \$122.1   | \$117.8      | \$126.5      | \$139.7   | \$135.2      | \$144.2      |
| <b>Other Care</b>                                |           |              |              |           |              |              |           |              |              |           |              |              |
| Assistive devices                                | -\$1.6    | -\$2.6       | -\$0.6       | -\$2.4    | -\$3.4       | -\$1.4       | -\$2.4    | -\$3.3       | -\$1.4       | -\$0.3    | -\$1.2       | \$0.6        |
| Home care                                        | \$77.4    | \$73.5       | \$81.3       | \$100.5   | \$95.9       | \$105.0      | \$103.6   | \$99.5       | \$107.7      | \$125.0   | \$120.7      | \$129.2      |
| Diagnostic tests                                 | \$5.9     | \$5.6        | \$6.2        | \$5.7     | \$5.5        | \$6.0        | \$6.1     | \$5.8        | \$6.4        | \$7.0     | \$6.7        | \$7.3        |
| Non-physician care <sup>5</sup>                  | -\$1.9    | -\$2.2       | -\$1.7       | -\$2.2    | -\$2.5       | -\$2.0       | -\$2.6    | -\$2.9       | -\$2.3       | -\$2.8    | -\$3.1       | -\$2.5       |
| <b>Total Direct Cost</b>                         | \$1,024.5 | \$997.2      | \$1,051.9    | \$1,526.2 | \$1,494.1    | \$1,558.3    | \$1,879.9 | \$1,842.7    | \$1,917.0    | \$2,073.0 | \$2,034.3    | \$2,111.7    |

<sup>1</sup> Costs are presented for matched cancer patients (cases) only.

<sup>2</sup> Data for cancer and dialysis clinics were missing for 2005.

<sup>3</sup> Data for psychiatric hospitalizations were missing from January 2005 to September 2005.

<sup>4</sup> 'Drugs' includes outpatient prescription drugs covered by the provincial government payer.

<sup>5</sup> 'Non-physician care' includes care provided by other professionals outside the hospital setting.

**Source:** Data housed at Institute for Clinical Evaluative Sciences.



**Table 3 – Total net cost<sup>1</sup> and 95% confidence intervals (CI), by cost category for patients with malignant neoplasms diagnosed in the past 10 years in Ontario, 2009–2012 (constant 2015 \$000,000)**

| COST COMPONENT:                     | 2009      |              |              | 2010      |              |              | 2011      |              |              | 2012      |              |              |
|-------------------------------------|-----------|--------------|--------------|-----------|--------------|--------------|-----------|--------------|--------------|-----------|--------------|--------------|
|                                     | Net Cost  | Lower 95% CI | Upper 95% CI | Net Cost  | Lower 95% CI | Upper 95% CI | Net Cost  | Lower 95% CI | Upper 95% CI | Net Cost  | Lower 95% CI | Upper 95% CI |
| <b>Hospital Care</b>                |           |              |              |           |              |              |           |              |              |           |              |              |
| Acute inpatient hospital care       | \$571.3   | \$547.2      | \$595.3      | \$566.5   | \$542.6      | \$590.3      | \$597.3   | \$573.4      | \$621.2      | \$724.4   | \$700.4      | \$748.5      |
| Ambulatory hospital care            |           |              |              |           |              |              |           |              |              |           |              |              |
| Day surgery                         | \$48.3    | \$46.9       | \$49.7       | \$48.5    | \$47.1       | \$49.9       | \$55.1    | \$53.7       | \$56.5       | \$61.7    | \$60.2       | \$63.2       |
| Emergency department visits         | \$9.5     | \$8.5        | \$10.4       | \$8.8     | \$7.8        | \$9.7        | \$11.2    | \$10.2       | \$12.2       | \$16.8    | \$15.7       | \$17.8       |
| Cancer clinics                      | \$474.1   | \$468.5      | \$479.8      | \$497.6   | \$491.6      | \$503.7      | \$753.3   | \$744.5      | \$762.2      | \$783.2   | \$774.4      | \$791.9      |
| Dialysis clinics                    | -\$25.1   | -\$33.4      | -\$16.9      | -\$30.3   | -\$39.2      | -\$21.4      | -\$15.7   | -\$21.8      | -\$9.7       | -\$4.2    | -\$10.5      | \$2.2        |
| Psychiatric inpatient hospital care | -\$22.0   | -\$27.9      | -\$16.1      | -\$26.5   | -\$32.7      | -\$20.3      | -\$27.3   | -\$33.7      | -\$20.9      | -\$25.7   | -\$32.5      | -\$18.9      |
| Chronic and rehabilitation care     |           |              |              |           |              |              |           |              |              |           |              |              |
| Complex continuing care             | -\$14.2   | -\$24.1      | -\$4.2       | -\$1.1    | -\$11.2      | \$9.0        | -\$0.5    | -\$10.4      | \$9.4        | \$14.3    | \$4.3        | \$24.2       |
| Long-term care                      | -\$139.9  | -\$147.7     | -\$132.0     | -\$148.9  | -\$157.7     | -\$140.1     | -\$149.4  | -\$158.5     | -\$140.4     | -\$121.8  | -\$130.8     | -\$112.8     |
| Rehabilitation                      | \$5.8     | \$1.4        | \$10.2       | \$4.9     | -\$0.8       | \$10.7       | \$6.0     | \$1.3        | \$10.7       | \$13.4    | \$8.2        | \$18.6       |
| Other hospital care                 |           |              |              |           |              |              |           |              |              |           |              |              |
| Chemotherapy                        | \$172.0   | \$168.2      | \$175.8      | \$186.4   | \$182.3      | \$190.5      | \$194.3   | \$190.1      | \$198.6      | \$212.5   | \$208.0      | \$217.1      |
| Radiation therapy                   | \$185.0   | \$181.2      | \$188.7      | \$201.0   | \$197.1      | \$205.0      | \$234.1   | \$229.9      | \$238.4      | \$240.8   | \$236.4      | \$245.2      |
| <b>Physician Care</b>               |           |              |              |           |              |              |           |              |              |           |              |              |
| Fee-for-service                     | \$242.6   | \$237.9      | \$247.3      | \$260.8   | \$256.7      | \$264.8      | \$287.5   | \$283.5      | \$291.6      | \$314.8   | \$310.7      | \$318.9      |
| Non-fee-for-service                 | \$71.9    | \$68.4       | \$75.5       | \$60.7    | \$59.8       | \$61.7       | \$41.8    | \$41.1       | \$42.4       | \$50.0    | \$49.3       | \$50.8       |
| <b>Drugs<sup>2</sup></b>            | \$136.8   | \$132.0      | \$141.6      | \$147.6   | \$141.9      | \$153.3      | \$159.0   | \$152.9      | \$165.1      | \$190.6   | \$184.0      | \$197.3      |
| <b>Other Care</b>                   |           |              |              |           |              |              |           |              |              |           |              |              |
| Assistive devices <sup>3</sup>      | -\$2.8    | -\$3.6       | -\$2.0       | -\$0.8    | -\$1.1       | -\$0.4       | n/a       | n/a          | n/a          | n/a       | n/a          | n/a          |
| Home care                           | \$108.3   | \$103.8      | \$112.8      | \$107.8   | \$103.1      | \$112.5      | \$118.9   | \$113.7      | \$124.0      | \$136.3   | \$131.3      | \$141.3      |
| Diagnostic tests                    | \$6.8     | \$6.5        | \$7.1        | \$6.4     | \$6.2        | \$6.7        | \$6.3     | \$6.0        | \$6.5        | \$6.8     | \$6.5        | \$7.0        |
| Non-physician care <sup>4</sup>     | -\$3.0    | -\$3.3       | -\$2.6       | -\$3.7    | -\$4.1       | -\$3.4       | -\$3.9    | -\$4.2       | -\$3.5       | -\$3.6    | -\$4.0       | -\$3.2       |
| <b>Total Direct Cost</b>            | \$1,825.4 | \$1,785.9    | \$1,864.9    | \$1,885.7 | \$1,845.4    | \$1,926.0    | \$2,268.1 | \$2,227.0    | \$2,309.2    | \$2,610.4 | \$2,568.5    | \$2,652.2    |

<sup>1</sup> Costs are presented for matched cancer patients (cases) only.

<sup>2</sup> 'Drugs' includes outpatient prescription drugs covered by the provincial government payer.

<sup>3</sup> Data for assistive devices were missing from September 2010 onwards.

<sup>4</sup> 'Non-physician care' includes care provided by other professionals outside the hospital setting.

**Source:** Data housed at Institute for Clinical Evaluative Sciences.

**Table 4 – Total public expenditures on cancer care in Canada, by cost category and year (2005–2008) (constant 2015 \$'000,000)**

|                                                                                         | 2005             | 2006             | 2007             | 2008             |
|-----------------------------------------------------------------------------------------|------------------|------------------|------------------|------------------|
| <b>Original EBIC Report Estimates</b>                                                   |                  |                  |                  |                  |
| Hospital Care                                                                           | \$2,267.5        | \$2,345.7        | \$2,504.9        | \$2,542.1        |
| Physician Care                                                                          | \$847.1          | \$894.1          | \$1,027.2        | \$1,125.9        |
| Drugs <sup>1</sup>                                                                      | \$408.5          | \$625.2          | \$560.7          | \$509.8          |
| Other Care <sup>2</sup>                                                                 |                  |                  |                  |                  |
| <b>Total Expenditures</b>                                                               | <b>\$3,523.2</b> | <b>\$3,865.0</b> | <b>\$4,092.9</b> | <b>\$4,177.8</b> |
| <b>Revised Estimates</b>                                                                |                  |                  |                  |                  |
| Hospital Care                                                                           | \$1,645.7        | \$1,828.7        | \$2,463.1        | \$2,600.1        |
| Radiation Therapy                                                                       | \$186.7          | \$286.9          | \$412.0          | \$484.4          |
| Chemotherapy                                                                            | \$208.8          | \$301.7          | \$360.0          | \$450.3          |
| Physician Care                                                                          | \$496.4          | \$549.5          | \$608.3          | \$697.4          |
| Drugs <sup>1</sup>                                                                      | \$209.9          | \$230.4          | \$255.5          | \$295.0          |
| Other Care <sup>2</sup>                                                                 | \$199.5          | \$387.0          | \$368.0          | \$410.9          |
| <b>Total Expenditures (excluding chemotherapy, radiation therapy, and other care)</b>   | <b>\$2,351.9</b> | <b>\$2,608.7</b> | <b>\$3,326.9</b> | <b>\$3,592.5</b> |
| <b>Total Expenditures (including chemotherapy and radiation therapy)</b>                | <b>\$2,747.5</b> | <b>\$3,197.4</b> | <b>\$4,098.8</b> | <b>\$4,527.2</b> |
| <b>Total Expenditures (including chemotherapy, radiation therapy and other care)</b>    | <b>\$2,947.0</b> | <b>\$3,584.4</b> | <b>\$4,466.8</b> | <b>\$4,938.1</b> |
| <b>Difference: Revised Estimates versus Original EBIC Report Estimates</b>              |                  |                  |                  |                  |
| Revised estimates excluding chemotherapy, radiation therapy, and other care             | -\$1,171.2       | -\$1,256.3       | -\$766.0         | -\$585.2         |
| Revised estimates including chemotherapy and radiation therapy but excluding other care | -\$775.7         | -\$667.7         | \$5.9            | \$349.4          |
| Revised estimates including chemotherapy, radiation therapy and other care              | -\$576.2         | -\$280.6         | \$374.0          | \$760.3          |

<sup>1</sup> 'Drugs' includes expenditures by both public and private insurance plans in the Original EBIC report estimates but includes only public expenditures in the revised estimates.

<sup>2</sup> 'Other Care' includes non-physician care (including other professional services performed outside the hospital setting), diagnostic testing, home care, and assistive devices.

**Source:** Economic Burden of Illness in Canada (EBIC) 2005–2008 report;<sup>3</sup> costs for Canada were estimated using a combination of purpose-derived estimates of mean net costs of cancer in Ontario, National Health Expenditures (NHEX) data on relative expenditures by cost category for each province versus Ontario (Table E),<sup>5</sup> and prevalence figures for each province/territory, which were estimated based on data from the Canadian Cancer Society (CCS) and Statistics Canada,<sup>7–9</sup> and NHEX data on population by age, sex and province/territory for 2005–2012.<sup>5</sup>

## STROBE Statement—checklist of items that should be included in reports of observational studies

|                              | Item No | Recommendation                                                                                                                                                                                                                                                                                                                                                                                                                                                                                                                                                                                                                                                                                   |
|------------------------------|---------|--------------------------------------------------------------------------------------------------------------------------------------------------------------------------------------------------------------------------------------------------------------------------------------------------------------------------------------------------------------------------------------------------------------------------------------------------------------------------------------------------------------------------------------------------------------------------------------------------------------------------------------------------------------------------------------------------|
| <b>Title and abstract</b>    | 1       | (a) Indicate the study's design with a commonly used term in the title or the abstract<br>(b) Provide in the abstract an informative and balanced summary of what was done and what was found                                                                                                                                                                                                                                                                                                                                                                                                                                                                                                    |
| <b>Introduction</b>          |         |                                                                                                                                                                                                                                                                                                                                                                                                                                                                                                                                                                                                                                                                                                  |
| Background/rationale         | 2       | Explain the scientific background and rationale for the investigation being reported                                                                                                                                                                                                                                                                                                                                                                                                                                                                                                                                                                                                             |
| Objectives                   | 3       | State specific objectives, including any prespecified hypotheses                                                                                                                                                                                                                                                                                                                                                                                                                                                                                                                                                                                                                                 |
| <b>Methods</b>               |         |                                                                                                                                                                                                                                                                                                                                                                                                                                                                                                                                                                                                                                                                                                  |
| Study design                 | 4       | Present key elements of study design early in the paper                                                                                                                                                                                                                                                                                                                                                                                                                                                                                                                                                                                                                                          |
| Setting                      | 5       | Describe the setting, locations, and relevant dates, including periods of recruitment, exposure, follow-up, and data collection                                                                                                                                                                                                                                                                                                                                                                                                                                                                                                                                                                  |
| Participants                 | 6       | (a) <i>Cohort study</i> —Give the eligibility criteria, and the sources and methods of selection of participants. Describe methods of follow-up<br><i>Case-control study</i> —Give the eligibility criteria, and the sources and methods of case ascertainment and control selection. Give the rationale for the choice of cases and controls<br><i>Cross-sectional study</i> —Give the eligibility criteria, and the sources and methods of selection of participants<br>(b) <i>Cohort study</i> —For matched studies, give matching criteria and number of exposed and unexposed<br><i>Case-control study</i> —For matched studies, give matching criteria and the number of controls per case |
| Variables                    | 7       | Clearly define all outcomes, exposures, predictors, potential confounders, and effect modifiers. Give diagnostic criteria, if applicable                                                                                                                                                                                                                                                                                                                                                                                                                                                                                                                                                         |
| Data sources/<br>measurement | 8*      | For each variable of interest, give sources of data and details of methods of assessment (measurement). Describe comparability of assessment methods if there is more than one group                                                                                                                                                                                                                                                                                                                                                                                                                                                                                                             |
| Bias                         | 9       | Describe any efforts to address potential sources of bias                                                                                                                                                                                                                                                                                                                                                                                                                                                                                                                                                                                                                                        |
| Study size                   | 10      | Explain how the study size was arrived at                                                                                                                                                                                                                                                                                                                                                                                                                                                                                                                                                                                                                                                        |
| Quantitative variables       | 11      | Explain how quantitative variables were handled in the analyses. If applicable, describe which groupings were chosen and why                                                                                                                                                                                                                                                                                                                                                                                                                                                                                                                                                                     |
| Statistical methods          | 12      | (a) Describe all statistical methods, including those used to control for confounding<br>(b) Describe any methods used to examine subgroups and interactions<br>(c) Explain how missing data were addressed<br>(d) <i>Cohort study</i> —If applicable, explain how loss to follow-up was addressed<br><i>Case-control study</i> —If applicable, explain how matching of cases and controls was addressed<br><i>Cross-sectional study</i> —If applicable, describe analytical methods taking account of sampling strategy<br>(e) Describe any sensitivity analyses                                                                                                                                |

Continued on next page

**Results**

|                  |     |                                                                                                                                                                                                                                                                                                                                                                                                               |
|------------------|-----|---------------------------------------------------------------------------------------------------------------------------------------------------------------------------------------------------------------------------------------------------------------------------------------------------------------------------------------------------------------------------------------------------------------|
| Participants     | 13* | (a) Report numbers of individuals at each stage of study—eg numbers potentially eligible, examined for eligibility, confirmed eligible, included in the study, completing follow-up, and analysed<br>(b) Give reasons for non-participation at each stage<br>(c) Consider use of a flow diagram                                                                                                               |
| Descriptive data | 14* | (a) Give characteristics of study participants (eg demographic, clinical, social) and information on exposures and potential confounders<br>(b) Indicate number of participants with missing data for each variable of interest<br>(c) <i>Cohort study</i> —Summarise follow-up time (eg, average and total amount)                                                                                           |
| Outcome data     | 15* | <i>Cohort study</i> —Report numbers of outcome events or summary measures over time<br><i>Case-control study</i> —Report numbers in each exposure category, or summary measures of exposure<br><i>Cross-sectional study</i> —Report numbers of outcome events or summary measures                                                                                                                             |
| Main results     | 16  | (a) Give unadjusted estimates and, if applicable, confounder-adjusted estimates and their precision (eg, 95% confidence interval). Make clear which confounders were adjusted for and why they were included<br>(b) Report category boundaries when continuous variables were categorized<br>(c) If relevant, consider translating estimates of relative risk into absolute risk for a meaningful time period |
| Other analyses   | 17  | Report other analyses done—eg analyses of subgroups and interactions, and sensitivity analyses                                                                                                                                                                                                                                                                                                                |

**Discussion**

|                  |    |                                                                                                                                                                            |
|------------------|----|----------------------------------------------------------------------------------------------------------------------------------------------------------------------------|
| Key results      | 18 | Summarise key results with reference to study objectives                                                                                                                   |
| Limitations      | 19 | Discuss limitations of the study, taking into account sources of potential bias or imprecision. Discuss both direction and magnitude of any potential bias                 |
| Interpretation   | 20 | Give a cautious overall interpretation of results considering objectives, limitations, multiplicity of analyses, results from similar studies, and other relevant evidence |
| Generalisability | 21 | Discuss the generalisability (external validity) of the study results                                                                                                      |

**Other information**

|         |    |                                                                                                                                                               |
|---------|----|---------------------------------------------------------------------------------------------------------------------------------------------------------------|
| Funding | 22 | Give the source of funding and the role of the funders for the present study and, if applicable, for the original study on which the present article is based |
|---------|----|---------------------------------------------------------------------------------------------------------------------------------------------------------------|

\*Give information separately for cases and controls in case-control studies and, if applicable, for exposed and unexposed groups in cohort and cross-sectional studies.

**Note:** An Explanation and Elaboration article discusses each checklist item and gives methodological background and published examples of transparent reporting. The STROBE checklist is best used in conjunction with this article (freely available on the Web sites of PLoS Medicine at <http://www.plosmedicine.org/>, Annals of Internal Medicine at <http://www.annals.org/>, and Epidemiology at <http://www.epidem.com/>). Information on the STROBE Initiative is available at [www.strobe-statement.org](http://www.strobe-statement.org).

**Note from authors:** all items have been checked.

## Appendix

### I. Cancer prevalence in Canada

We obtained 10-year person-based cancer prevalence rates for all of Canada for some years of our study period from data published by Statistics Canada in conjunction with the Canadian Cancer Society. Data on cancer prevalence broken down by province and territory were not available. However, 10-year person-based prevalence rates by sex were available for 2005, 2007 and 2009 only.<sup>1-3</sup> Based on the available data, we used linear interpolation to extrapolate prevalence rates by sex for the remaining years (2006, 2008, and 2010-2012).

The Canadian Cancer Statistics 2014 publication included tumour-based 10-year prevalence by sex and age group (ages 0-19, 20-29, 30-39, 40-49, 50-59, 60-69, 70-79, and 80+) (Table 6.2).<sup>3</sup> These data show that tumour prevalence rises with age, peaking for those 60-79 years of age. Mariotto and colleagues show that the likelihood of having more than one primary tumour rises with age.<sup>4</sup> Hence, rather than apply the sex and age distribution of tumour-based prevalence directly to person-based prevalence, we redistributed the sex and age weights to reflect the likelihood of finding fewer tumours per person among younger people and more tumours per person among older people. We then calculated the numbers of people living with cancer as of January 1<sup>st</sup>, 2009, by multiplying the sex/age group weights by the total number of males and females in each age group in the population. Finally, we divided the total population by the estimated numbers of people with cancer as of January 1<sup>st</sup>, 2009, in each sex/age group, to obtain the prevalence expressed as “1 in n” members of the Canadian population. We extrapolated the sex and age group distributed prevalence estimates from 2009 to all other years in our study based on the overall total prevalence estimates by sex for each year (described above).

To estimate the number of people living with cancer, we assumed the same prevalence rate in each province/territory (the prevalence rate for Canada) and multiplied our sex and age group prevalence estimates by the population (broken down by the corresponding sex and age groups) of each province/territory obtained from NHEX data (Appendix tables C.11 to C.18).<sup>5</sup> For comparability with the EBIC report, we redistributed the total prevalence estimates from the Canadian Cancer Statistics 2014 groupings (provided above) to those used in the EBIC report (ages 0-14, 15-34, 35-54, 55-64, 65-74, and 75+) assuming equal allocations across age groups. For example, half of those ages 70-79 were allocated to the 65-74 year old group and half to the 75 and older group.

Table 2 includes estimates of cancer prevalence in Canada by sex for each year of our analysis. Our results suggest that prevalence in Canada has been increasing over time for both sexes, from 663,827 in 2005 to 958,632 in 2012 (an increase of 44.4% or 5.6% per annum). Between 2005 and 2007, we estimate that there were slightly more females than males with cancer in Canada; from 2008 onward the trend reverses (Figure 1). Prevalence increased in a linear fashion with age across the study period. The number of children (0-14) and young people (15-34) with cancer was low and rose slowly over the period. The number of patients with cancer between the ages of 35 and 54 was higher but remained relatively flat over the time period. By contrast, prevalence increased steadily from 2005 to 2012 among older patients (ages 55-64, 65-74 and 75 and older).

Table A1 – Estimated 10-year cancer prevalence\* by year (2005-2008 and 2009-2012), age and sex, for Canada

|                   | 2005    | 2006    | 2007    | 2008    | 2009    | 2010    | 2011    | 2012    |
|-------------------|---------|---------|---------|---------|---------|---------|---------|---------|
| <b>Both Sexes</b> |         |         |         |         |         |         |         |         |
| 0-14              | 4,917   | 5,065   | 5,235   | 5,373   | 5,516   | 5,659   | 5,810   | 5,972   |
| 15-34             | 21,474  | 22,172  | 23,039  | 23,707  | 24,476  | 25,304  | 26,115  | 27,162  |
| 35-54             | 128,510 | 134,437 | 140,006 | 143,795 | 147,877 | 152,117 | 156,457 | 161,027 |
| 55-64             | 135,868 | 145,395 | 156,809 | 166,814 | 177,177 | 188,269 | 199,681 | 211,507 |
| 65-74             | 169,779 | 179,373 | 191,518 | 202,451 | 214,193 | 226,805 | 240,538 | 255,661 |
| 75+               | 203,278 | 214,122 | 226,584 | 237,943 | 250,283 | 264,151 | 279,562 | 297,303 |
| Total             | 663,827 | 700,565 | 743,192 | 780,083 | 819,522 | 862,304 | 908,163 | 958,632 |
| <b>Female</b>     |         |         |         |         |         |         |         |         |
| 0-14              | 2,209   | 2,276   | 2,355   | 2,388   | 2,419   | 2,446   | 2,472   | 2,498   |
| 15-34             | 12,471  | 12,877  | 13,398  | 13,669  | 13,982  | 14,317  | 14,623  | 15,022  |
| 35-54             | 83,926  | 87,694  | 91,199  | 92,746  | 94,390  | 96,043  | 97,653  | 99,338  |
| 55-64             | 72,127  | 77,123  | 82,921  | 86,994  | 91,091  | 95,325  | 99,493  | 103,735 |
| 65-74             | 74,324  | 78,397  | 83,720  | 87,315  | 91,039  | 94,887  | 98,885  | 103,202 |
| 75+               | 91,960  | 96,446  | 101,692 | 104,931 | 108,359 | 112,165 | 116,167 | 120,608 |
| Total             | 337,017 | 354,814 | 375,285 | 388,044 | 401,280 | 415,182 | 429,294 | 444,404 |
| <b>Male</b>       |         |         |         |         |         |         |         |         |
| 0-14              | 2,708   | 2,789   | 2,879   | 2,984   | 3,097   | 3,213   | 3,338   | 3,474   |
| 15-34             | 9,004   | 9,295   | 9,640   | 10,038  | 10,495  | 10,986  | 11,492  | 12,140  |
| 35-54             | 44,584  | 46,743  | 48,807  | 51,049  | 53,486  | 56,074  | 58,803  | 61,689  |
| 55-64             | 63,741  | 68,272  | 73,889  | 79,820  | 86,086  | 92,944  | 100,189 | 107,772 |
| 65-74             | 95,455  | 100,976 | 107,799 | 115,136 | 123,154 | 131,918 | 141,653 | 152,458 |
| 75+               | 111,318 | 117,676 | 124,892 | 133,012 | 141,924 | 151,986 | 163,395 | 176,695 |
| Total             | 326,809 | 345,751 | 367,906 | 392,039 | 418,241 | 447,122 | 478,869 | 514,228 |

**Source:** 10-year cancer prevalence was estimated using a combination of published 10-year prevalence figures for Canada as a whole for selected years (2005, 2007 and 2009) from the Canadian Cancer Society (CCS) and Statistics Canada<sup>1-3</sup> and National Health Expenditure data on population by age, sex and province/territory for 2005–2012.<sup>5</sup>

Figure A1 – Estimated 10-year cancer prevalence by sex and year (2005-2008 and 2009-2012), Canada

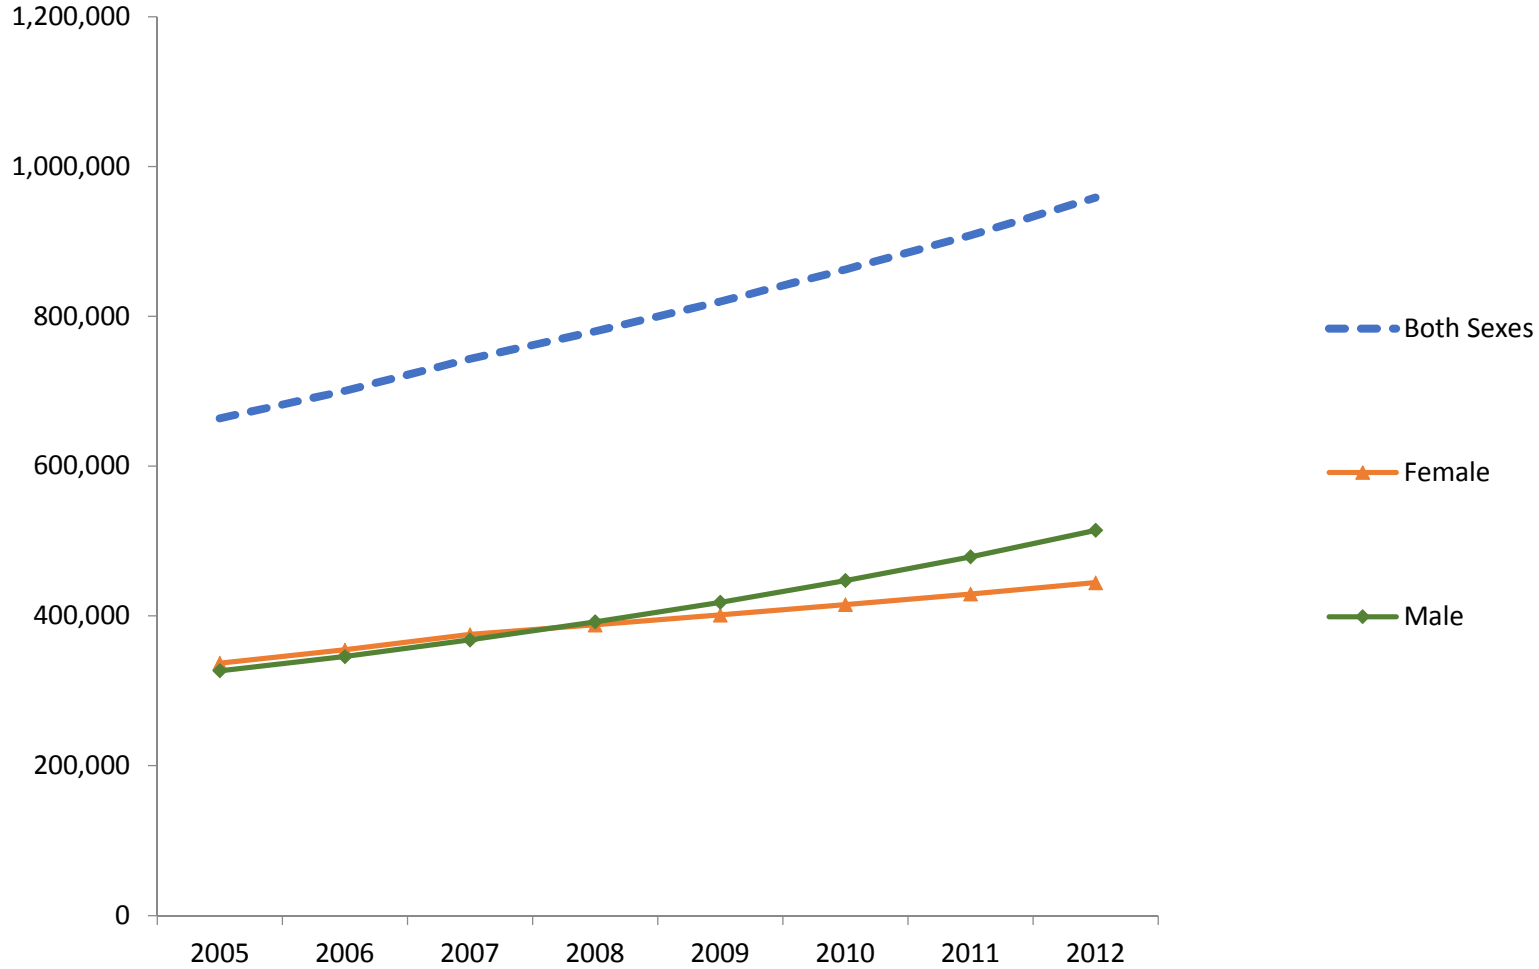

Source: 10-year cancer prevalence was estimated using a combination of published 10-year prevalence figures for Canada as a whole for selected years (2005, 2007 and 2009) from the Canadian Cancer Society (CCS) and Statistics Canada<sup>1-3</sup> and National Health Expenditure data on population by age, sex and province/territory for 2005–2012.<sup>5</sup>

Table A2 - Neoplasm codes

| EBIC CODE  | EBIC DIAGNOSTIC CATEGORIES         | ICD-9 CODE                                                                                              | ICD-10 CODE                                                                                                                                 |
|------------|------------------------------------|---------------------------------------------------------------------------------------------------------|---------------------------------------------------------------------------------------------------------------------------------------------|
| <b>E06</b> | <b>Malignant Neoplasms</b>         | <b>140-208, 238.6</b>                                                                                   | <b>C00-C97</b>                                                                                                                              |
| E06.1      | Oral Cancers                       | 140-149                                                                                                 | C00-C14                                                                                                                                     |
| E06.2      | Esophagus Cancer                   | 150                                                                                                     | C15                                                                                                                                         |
| E06.3      | Stomach Cancer                     | 151                                                                                                     | C16                                                                                                                                         |
| E06.4      | Colorectal Cancer                  | 153,154,159.0                                                                                           | C18-C21,C26.0                                                                                                                               |
| E06.5      | Liver Cancer                       | 155 (minus 155.1,155.2)                                                                                 | C22.0,C22.2-C22.7                                                                                                                           |
| E06.6      | Pancreas Cancer                    | 157                                                                                                     | C25                                                                                                                                         |
| E06.7      | Larynx Cancer                      | 161                                                                                                     | C32                                                                                                                                         |
| E06.8      | Trachea Cancer                     | 162.0                                                                                                   | C33                                                                                                                                         |
| E06.9      | Bronchus and Lung Cancers          | 162.2-162.9                                                                                             | C34                                                                                                                                         |
| E06.10     | Melanoma                           | 172                                                                                                     | C43                                                                                                                                         |
| E06.11     | Other Skin Cancers                 | 173                                                                                                     | C44                                                                                                                                         |
| E06.12     | Breast Cancer                      | 174,175                                                                                                 | C50                                                                                                                                         |
| E06.13     | Cervix Cancer                      | 180                                                                                                     | C53                                                                                                                                         |
| E06.14     | Body of Uterus Cancer              | 179,182                                                                                                 | C54-C55                                                                                                                                     |
| E06.15     | Ovary Cancer                       | 183                                                                                                     | C56                                                                                                                                         |
| E06.16     | Prostate Cancer                    | 185                                                                                                     | C61                                                                                                                                         |
| E06.17     | Testis Cancer                      | 186                                                                                                     | C62                                                                                                                                         |
| E06.18     | Bladder Cancer (including in situ) | 188                                                                                                     | C67                                                                                                                                         |
| E06.19     | Kidney Cancer                      | 189.0,189.1                                                                                             | C64-C65                                                                                                                                     |
| E06.20     | Brain Cancer                       | 191,192                                                                                                 | C70-C72                                                                                                                                     |
| E06.21     | Thyroid Cancer                     | 193                                                                                                     | C73                                                                                                                                         |
| E06.22     | Hodgkin Lymphoma                   | 201                                                                                                     | C81                                                                                                                                         |
| E06.23     | Non-Hodgkin Lymphoma               | 200,202 (minus 202.4)                                                                                   | C82-C85,C96.3                                                                                                                               |
| E06.24     | Multiple Myeloma                   | 203.0                                                                                                   | C90.0,C90.2                                                                                                                                 |
| E06.25     | Leukemia                           | 202.4,203.1,204-208                                                                                     | C90.1,C91-C95                                                                                                                               |
| E06.26     | Other Malignant Neoplasms          | 152, 155.1, 155.2, 156,<br>158-160, 163-171, 176, 81,<br>184, 187, 189.2-190, 194-<br>199, 203.8, 238.6 | C17, C22.1, C22.9, C23, C24,<br>C26-C31, C37-C41, C45-C49,<br>C51, C52, C57-C60, C63, C66,<br>C68-C69, C74-C80, C86, C88,<br>C90.3,C96, C97 |

**Legend:**

EBIC – Economic Burden of Illness in Canada

ICD – International Classification of Diseases



## II. Cost extrapolation to other provinces/territories and Canada

Data from the NHEX were used to create extrapolation factors to reflect differences between Ontario and each province/territory,  $j$ , in terms of relative expenditures by category  $k$  (where  $k$  = hospital care, physician care and provincial/territorial government-funded outpatient prescription drugs). This calculation consisted of three steps:

- (1) Estimate the mean net cost of category  $k$ , for each sex/age group in a given province,  $j$ , by multiplying the estimate of the mean net cost of category  $k$  for patients in that sex/age group in Ontario by the ratio of total expenditures in category  $k$  for each sex/age group in province  $j$  to total expenditures in category  $k$  by sex/age group in Ontario, as follows

Estimated  
using ICES  
data

Estimated using  
NHEX data

$$NC_k^j = NC_k^{ON} * \left( \frac{CPP_{TOTk}^j}{CPP_{TOTk}^{ON}} \right),$$

where  $NC_k^j$  is the mean net cost of category  $k$  in a given sex/age group and province  $j$ ,  $NC_k^{ON}$  is the mean net cost of category  $k$  per patient in a given sex/age group in Ontario,  $CPP_{TOTk}^j$  is the mean cost per person of total expenditures in category  $k$  for that sex/age group in province  $j$ , and  $CPP_{TOTk}^{ON}$  is the mean cost per patient of total expenditures in category  $k$  for that sex/age group in Ontario.

- (2) Estimate total net cost of category  $k$  for cancer patients in province  $j$  by multiplying the mean net estimated cost of category  $k$  for cancer in each sex/age group by the estimated number of patients diagnosed with cancer in the past 10 years in that sex/age group and then sum over the totals for each sex/age group to obtain the total net cost of category  $k$  for cancer patients in province  $j$  as follows

$$TC_k^j = \sum_i (NC * POP)_i,$$

where  $TC_k^j$  is the total net cost of category  $k$  for cancer patients in province  $j$  over all sex/age groups,  $NC$  is the mean net cost of category  $k$  for cancer per patient in a given sex/age group in province  $j$ ,  $POP$  is the total number of patients diagnosed with cancer in the prior 10 years in a given sex/age group in province  $j$ , and  $i$  denotes a member in the set of sex/age groups.

- (3) Estimate the total net cost of category  $k$  for cancer patients across Canada by summing total net cost estimates of category  $k$  across each province/territory  $j$ .

1  
2  
3  
4  
5  
6  
7  
8  
9  
10  
11  
12  
13  
14  
15  
16  
17  
18  
19  
20  
21  
22  
23  
24  
25  
26  
27  
28  
29  
30  
31  
32  
33  
34  
35  
36  
37  
38  
39  
40  
41  
42  
43  
44  
45  
46  
47  
48  
49

III. Quality of control match

Table A3 – Summary of case-control match, 2005 and 2009

| Study Period |                           | Eligible Cases (N) | Matched Cases (N) | Matched Cases (%) | Unique Controls (N) | Controls Re-Used (%) |
|--------------|---------------------------|--------------------|-------------------|-------------------|---------------------|----------------------|
| 2005 -2008   | Alive during study period | 472,468            | 470,620           | 99.6%             | 549,124             | 6.1%                 |
|              | Died during study period  | 138,611            | 114,354           | 82.5%             |                     |                      |
|              | Total                     | 611,079            | 584,974           | 95.7%             |                     |                      |
| 2009 -2012   | Alive during study period | 557,878            | 556,349           | 99.7%             | 646,694             | 4.7%                 |
|              | Died during study period  | 149,636            | 121,977           | 81.5%             |                     |                      |
|              | Total                     | 707,514            | 678,326           | 95.9%             |                     |                      |

Source: Data housed at Institute for Clinical Evaluative Sciences.

Confidential

Table A4 – Details of case-control match, 2005

| Variable   |              | 2005 Alive Cohort    |                         |                                           | 2005 Death Cohort    |                         |                                           |
|------------|--------------|----------------------|-------------------------|-------------------------------------------|----------------------|-------------------------|-------------------------------------------|
|            |              | Cases<br>(N=470,620) | Controls<br>(N=470,620) | Standardized<br>Difference in<br>the Mean | Cases<br>(N=114,354) | Controls<br>(N=114,354) | Standardized<br>Difference in<br>the Mean |
| Age, years | Mean ± SD    | 62.47 ± 15.37        | 62.15 ± 15.41           | 0.02                                      | 74.40 ± 12.83        | 74.70 ± 13.16           | 0.02                                      |
|            | Median (IQR) | 64 (53-74)           | 64 (52-74)              | 0.02                                      | 77 (67-83)           | 76 (68-84)              | 0.02                                      |
| CADG 1     | Number (%)   | 267,655 (56.9%)      | 267,655 (56.9%)         | 0                                         | 45,409 (39.7%)       | 45,409 (39.7%)          | 0                                         |
| CADG 2     | Number (%)   | 330,598 (70.2%)      | 330,598 (70.2%)         | 0                                         | 57,745 (50.5%)       | 57,745 (50.5%)          | 0                                         |
| CADG 3     | Number (%)   | 219,650 (46.7%)      | 219,650 (46.7%)         | 0                                         | 29,863 (26.1%)       | 29,863 (26.1%)          | 0                                         |
| CADG 4     | Number (%)   | 9,117 (1.9%)         | 9,117 (1.9%)            | 0                                         | 533 (0.5%)           | 533 (0.5%)              | 0                                         |
| CADG 5     | Number (%)   | 130,854 (27.8%)      | 130,854 (27.8%)         | 0                                         | 35,000 (30.6%)       | 35,000 (30.6%)          | 0                                         |
| CADG 6     | Number (%)   | 205,013 (43.6%)      | 205,013 (43.6%)         | 0                                         | 29,685 (26.0%)       | 29,685 (26.0%)          | 0                                         |
| CADG 7     | Number (%)   | 17,457 (3.7%)        | 17,457 (3.7%)           | 0                                         | 850 (0.7%)           | 850 (0.7%)              | 0                                         |
| CADG 8     | Number (%)   | 74,047 (15.7%)       | 74,047 (15.7%)          | 0                                         | 8,292 (7.3%)         | 8,292 (7.3%)            | 0                                         |
| CADG 9     | Number (%)   | 20,604 (4.4%)        | 20,604 (4.4%)           | 0                                         | 1,483 (1.3%)         | 1,483 (1.3%)            | 0                                         |
| CADG 10    | Number (%)   | 45,174 (9.6%)        | 45,174 (9.6%)           | 0                                         | 11,399 (10.0%)       | 11,399 (10.0%)          | 0                                         |
| CADG 11    | Number (%)   | 249,970 (53.1%)      | 249,970 (53.1%)         | 0                                         | 30,446 (26.6%)       | 30,446 (26.6%)          | 0                                         |
| CADG 12    | Number (%)   | 5,020 (1.1%)         | 5,020 (1.1%)            | 0                                         | 28 (0.0%)            | 28 (0.0%)               | 0                                         |

**Legend:** SD – standard deviation; IQR – interquartile range; CADG – Collapsed Adjusted Diagnosis Groups

**Note:** The cohort was matched on age+/-2 years, sex (hard match, not shown) and CADG from the Johns Hopkins Adjusted Clinical Groups (ACG) software.

**Source:** Data housed at Institute for Clinical Evaluative Sciences.

Table A5 – Details of case-control match, 2009

| Variable   |              | 2009 Alive Cohort    |                         |                                           | 2009 Death Cohort    |                         |                                           |
|------------|--------------|----------------------|-------------------------|-------------------------------------------|----------------------|-------------------------|-------------------------------------------|
|            |              | Cases<br>(N=556,349) | Controls<br>(N=556,349) | Standardized<br>Difference in<br>the Mean | Cases<br>(N=121,977) | Controls<br>(N=121,977) | Standardized<br>Difference in<br>the Mean |
| Age, years | Mean ± SD    | 63.01 ± 15.28        | 62.69 ± 15.27           | 0.02                                      | 75.29 ± 12.88        | 75.58 ± 13.22           | 0.02                                      |
|            | Median (IQR) | 64 (54-74)           | 64 (53-74)              | 0.02                                      | 78 (68-85)           | 78 (68-85)              | 0.02                                      |
| CADG 1     | Number (%)   | 313,355 (56.3%)      | 313,355 (56.3%)         | 0                                         | 46,470 (38.1%)       | 46,470 (38.1%)          | 0                                         |
| CADG 2     | Number (%)   | 387,581 (69.7%)      | 387,581 (69.7%)         | 0                                         | 59,709 (49.0%)       | 59,709 (49.0%)          | 0                                         |
| CADG 3     | Number (%)   | 264,207 (47.5%)      | 264,207 (47.5%)         | 0                                         | 33,183 (27.2%)       | 33,183 (27.2%)          | 0                                         |
| CADG 4     | Number (%)   | 9,636 (1.7%)         | 9,636 (1.7%)            | 0                                         | 398 (0.3%)           | 398 (0.3%)              | 0                                         |
| CADG 5     | Number (%)   | 162,609 (29.2%)      | 162,609 (29.2%)         | 0                                         | 40,814 (33.5%)       | 40,814 (33.5%)          | 0                                         |
| CADG 6     | Number (%)   | 262,161 (47.1%)      | 262,161 (47.1%)         | 0                                         | 37,822 (31.0%)       | 37,822 (31.0%)          | 0                                         |
| CADG 7     | Number (%)   | 20,560 (3.7%)        | 20,560 (3.7%)           | 0                                         | 854 (0.7%)           | 854 (0.7%)              | 0                                         |
| CADG 8     | Number (%)   | 84,432 (15.2%)       | 84,432 (15.2%)          | 0                                         | 7,781 (6.4%)         | 7,781 (6.4%)            | 0                                         |
| CADG 9     | Number (%)   | 24,693 (4.4%)        | 24,693 (4.4%)           | 0                                         | 1,660 (1.4%)         | 1,660 (1.4%)            | 0                                         |
| CADG 10    | Number (%)   | 53,887 (9.7%)        | 53,887 (9.7%)           | 0                                         | 12,627 (10.4%)       | 12,627 (10.4%)          | 0                                         |
| CADG 11    | Number (%)   | 318,355 (57.2%)      | 318,355 (57.2%)         | 0                                         | 36,181 (29.7%)       | 36,181 (29.7%)          | 0                                         |
| CADG 12    | Number (%)   | 5,843 (1.1%)         | 5,843 (1.1%)            | 0                                         | 31 (0.0%)            | 31 (0.0%)               | 0                                         |

Legend: SD – standard deviation; IQR – interquartile range; CADG – Collapsed Adjusted Diagnosis Groups

Note: The cohort was matched on age+/-2 years, sex (hard match, not shown) and CADG from the Johns Hopkins Adjusted Clinical Groups (ACG) software.

Source: Data housed at Institute for Clinical Evaluative Sciences.

## IV. Ontario patient-level costs

**Table A6 – Total gross cost, and 95% confidence intervals (CI), by cost component for patients with malignant neoplasms diagnosed in the past 10 years in Ontario, 2005–2008 (constant 2015 \$000,000)**

| COST COMPONENT:                     | 2005             |                  |                  | 2006             |                  |                  | 2007             |                  |                  | 2008             |                  |                  |
|-------------------------------------|------------------|------------------|------------------|------------------|------------------|------------------|------------------|------------------|------------------|------------------|------------------|------------------|
|                                     | Gross Cost       | Lower 95% CI     | Upper 95% CI     | Gross Cost       | Lower 95% CI     | Upper 95% CI     | Gross Cost       | Lower 95% CI     | Upper 95% CI     | Gross Cost       | Lower 95% CI     | Upper 95% CI     |
| <b>Hospital Care</b>                |                  |                  |                  |                  |                  |                  |                  |                  |                  |                  |                  |                  |
| Acute inpatient hospital care       | \$1,116.6        | \$1,104.2        | \$1,129.0        | \$1,248.7        | \$1,234.8        | \$1,262.6        | \$1,408.9        | \$1,391.0        | \$1,426.7        | \$1,471.4        | \$1,453.9        | \$1,489.0        |
| Ambulatory hospital care            |                  |                  |                  |                  |                  |                  |                  |                  |                  |                  |                  |                  |
| Day surgery                         | \$89.0           | \$88.2           | \$89.9           | \$96.4           | \$95.5           | \$97.3           | \$109.0          | \$108.0          | \$110.1          | \$117.5          | \$116.4          | \$118.5          |
| Emergency department visits         | \$73.0           | \$72.4           | \$73.6           | \$76.8           | \$76.1           | \$77.4           | \$83.0           | \$82.3           | \$83.7           | \$89.1           | \$88.4           | \$89.8           |
| Cancer clinics                      | n/a              | n/a              | n/a              | \$360.2          | \$355.9          | \$364.5          | \$521.3          | \$515.9          | \$526.7          | \$501.2          | \$495.8          | \$506.7          |
| Dialysis clinics                    | n/a              | n/a              | n/a              | \$38.4           | \$35.8           | \$41.1           | \$66.2           | \$61.8           | \$70.5           | \$87.7           | \$82.0           | \$93.4           |
| Psychiatric inpatient hospital care | \$18.1           | \$16.8           | \$19.4           | \$28.3           | \$25.7           | \$30.9           | \$37.2           | \$33.9           | \$40.5           | \$39.2           | \$35.5           | \$42.9           |
| Chronic and rehabilitation care     |                  |                  |                  |                  |                  |                  |                  |                  |                  |                  |                  |                  |
| Complex continuing care             | \$125.6          | \$119.5          | \$131.7          | \$123.3          | \$117.2          | \$129.4          | \$127.9          | \$121.6          | \$134.2          | \$132.2          | \$125.7          | \$138.7          |
| Long-term care                      | \$182.9          | \$178.3          | \$187.4          | \$189.6          | \$184.9          | \$194.3          | \$193.6          | \$188.8          | \$198.3          | \$198.9          | \$194.1          | \$203.8          |
| Rehabilitation                      | \$54.6           | \$51.6           | \$57.6           | \$62.1           | \$59.0           | \$65.3           | \$62.4           | \$59.1           | \$65.6           | \$68.6           | \$65.3           | \$71.9           |
| Other hospital care                 |                  |                  |                  |                  |                  |                  |                  |                  |                  |                  |                  |                  |
| Chemotherapy                        | \$92.3           | \$89.9           | \$94.6           | \$129.2          | \$125.7          | \$132.6          | \$150.6          | \$147.0          | \$154.1          | \$187.8          | \$183.9          | \$191.8          |
| Radiation therapy                   | \$82.7           | \$81.0           | \$84.4           | \$124.4          | \$122.2          | \$126.6          | \$174.3          | \$170.8          | \$177.9          | \$202.5          | \$198.5          | \$206.5          |
| <b>Physician Care</b>               |                  |                  |                  |                  |                  |                  |                  |                  |                  |                  |                  |                  |
| Fee-for-service                     | \$487.1          | \$483.9          | \$490.4          | \$538.4          | \$535.2          | \$541.5          | \$581.3          | \$577.2          | \$585.3          | \$629.4          | \$624.6          | \$634.1          |
| Non-fee-for-service                 | \$54.3           | \$53.5           | \$55.0           | \$69.4           | \$68.5           | \$70.3           | \$82.8           | \$81.8           | \$83.7           | \$101.8          | \$100.7          | \$102.9          |
| <b>Drugs*</b>                       | \$391.5          | \$388.0          | \$395.0          | \$424.3          | \$420.5          | \$428.2          | \$442.6          | \$438.9          | \$446.4          | \$474.5          | \$470.6          | \$478.3          |
| <b>Other Care</b>                   |                  |                  |                  |                  |                  |                  |                  |                  |                  |                  |                  |                  |
| Assistive devices                   | \$17.6           | \$16.9           | \$18.3           | \$17.4           | \$16.7           | \$18.0           | \$18.5           | \$17.9           | \$19.2           | \$19.6           | \$19.0           | \$20.2           |
| Home care                           | \$188.6          | \$185.8          | \$191.4          | \$241.7          | \$238.4          | \$245.0          | \$237.3          | \$234.4          | \$240.3          | \$260.0          | \$256.8          | \$263.1          |
| Diagnostic tests                    | \$35.6           | \$35.4           | \$35.8           | \$37.3           | \$37.1           | \$37.5           | \$39.8           | \$39.6           | \$40.0           | \$44.3           | \$44.1           | \$44.5           |
| Non-physician care**                | \$9.7            | \$9.5            | \$9.9            | \$10.5           | \$10.4           | \$10.7           | \$11.8           | \$11.6           | \$12.0           | \$13.7           | \$13.5           | \$13.9           |
| <b>Total Direct Cost</b>            | <b>\$3,019.3</b> | <b>\$2,999.1</b> | <b>\$3,039.5</b> | <b>\$3,816.2</b> | <b>\$3,792.0</b> | <b>\$3,840.5</b> | <b>\$4,348.4</b> | <b>\$4,319.6</b> | <b>\$4,377.2</b> | <b>\$4,639.4</b> | <b>\$4,609.4</b> | <b>\$4,669.4</b> |

**Note:** Data for assistive devices were missing from September 2010 onwards, data for cancer and dialysis clinics were missing for 2005, and data for psychiatric hospitalizations were missing from January 2005 to September 2005. Costs are presented for matched cancer patients (cases) only.

\* 'Drugs' includes outpatient prescription drugs covered by the provincial government payer.

\*\* 'Non-physician care' includes care provided by other professionals outside the hospital setting.

**Source:** Data housed at Institute for Clinical Evaluative Sciences.

**Table A7 – Total gross cost, and 95% confidence intervals (CI), by cost component for patients with malignant neoplasms diagnosed in the past 10 years in Ontario, 2009–2012 (constant 2015 \$000,000)**

| COST COMPONENT:                     | 2009             |                  |                  | 2010             |                  |                  | 2011             |                  |                  | 2012             |                  |                  |
|-------------------------------------|------------------|------------------|------------------|------------------|------------------|------------------|------------------|------------------|------------------|------------------|------------------|------------------|
|                                     | Gross Cost       | Lower 95% CI     | Upper 95% CI     | Gross Cost       | Lower 95% CI     | Upper 95% CI     | Gross Cost       | Lower 95% CI     | Upper 95% CI     | Gross Cost       | Lower 95% CI     | Upper 95% CI     |
| <b>Hospital Care</b>                |                  |                  |                  |                  |                  |                  |                  |                  |                  |                  |                  |                  |
| Acute inpatient hospital care       | \$1,413.0        | \$1,395.2        | \$1,430.8        | \$1,412.6        | \$1,395.3        | \$1,429.9        | \$1,450.2        | \$1,432.5        | \$1,467.8        | \$1,564.0        | \$1,545.3        | \$1,582.6        |
| Ambulatory hospital care            |                  |                  |                  |                  |                  |                  |                  |                  |                  |                  |                  |                  |
| Day surgery                         | \$116.6          | \$115.5          | \$117.6          | \$120.6          | \$119.6          | \$121.7          | \$129.9          | \$128.8          | \$131.0          | \$144.4          | \$143.2          | \$145.6          |
| Emergency department visits         | \$84.7           | \$84.0           | \$85.4           | \$86.2           | \$85.5           | \$86.8           | \$94.4           | \$93.7           | \$95.1           | \$104.4          | \$103.6          | \$105.1          |
| Cancer clinics                      | \$477.1          | \$471.4          | \$482.7          | \$500.8          | \$494.8          | \$506.9          | \$758.0          | \$749.1          | \$766.8          | \$788.4          | \$779.7          | \$797.1          |
| Dialysis clinics                    | \$82.4           | \$76.9           | \$87.9           | \$89.0           | \$83.1           | \$94.9           | \$62.9           | \$58.9           | \$67.0           | \$72.5           | \$68.0           | \$77.0           |
| Psychiatric inpatient hospital care | \$38.9           | \$35.4           | \$42.5           | \$41.3           | \$37.6           | \$44.9           | \$43.1           | \$39.2           | \$47.0           | \$48.9           | \$44.9           | \$52.9           |
| Chronic and rehabilitation care     |                  |                  |                  |                  |                  |                  |                  |                  |                  |                  |                  |                  |
| Complex continuing care             | \$127.3          | \$121.0          | \$133.6          | \$135.7          | \$129.1          | \$142.3          | \$136.4          | \$129.9          | \$143.0          | \$145.2          | \$138.3          | \$152.0          |
| Long-term care                      | \$183.6          | \$178.8          | \$188.3          | \$208.6          | \$203.3          | \$213.9          | \$215.1          | \$209.5          | \$220.6          | \$223.3          | \$217.6          | \$228.9          |
| Rehabilitation                      | \$63.7           | \$60.6           | \$66.9           | \$67.7           | \$64.3           | \$71.1           | \$73.8           | \$70.4           | \$77.2           | \$82.8           | \$79.0           | \$86.6           |
| Other hospital care                 |                  |                  |                  |                  |                  |                  |                  |                  |                  |                  |                  |                  |
| Chemotherapy                        | \$172.6          | \$168.8          | \$176.4          | \$187.3          | \$183.2          | \$191.3          | \$195.3          | \$191.0          | \$199.5          | \$213.6          | \$209.0          | \$218.1          |
| Radiation therapy                   | \$186.0          | \$182.2          | \$189.8          | \$202.6          | \$198.6          | \$206.5          | \$235.7          | \$231.5          | \$240.0          | \$242.6          | \$238.1          | \$247.0          |
| <b>Physician Care</b>               |                  |                  |                  |                  |                  |                  |                  |                  |                  |                  |                  |                  |
| Fee-for-service                     | \$595.3          | \$591.8          | \$598.9          | \$639.8          | \$636.7          | \$642.9          | \$694.8          | \$691.6          | \$698.1          | \$725.7          | \$722.4          | \$728.9          |
| Non-fee-for-service                 | \$112.8          | \$109.2          | \$116.3          | \$111.3          | \$110.4          | \$112.2          | \$102.5          | \$101.9          | \$103.1          | \$122.3          | \$121.6          | \$123.0          |
| <b>Drugs*</b>                       | \$474.2          | \$470.0          | \$478.4          | \$478.2          | \$473.0          | \$483.3          | \$485.4          | \$479.8          | \$490.9          | \$516.8          | \$510.8          | \$522.9          |
| <b>Other Care</b>                   |                  |                  |                  |                  |                  |                  |                  |                  |                  |                  |                  |                  |
| Assistive devices                   | \$18.6           | \$18.1           | \$19.2           | \$4.1            | \$3.8            | \$4.3            | n/a              | n/a              | n/a              | n/a              | n/a              | n/a              |
| Home care                           | \$257.3          | \$254.0          | \$260.7          | \$264.6          | \$261.2          | \$268.0          | \$289.1          | \$285.4          | \$292.7          | \$301.3          | \$297.6          | \$305.0          |
| Diagnostic tests                    | \$46.1           | \$45.9           | \$46.3           | \$46.2           | \$46.0           | \$46.4           | \$46.2           | \$46.0           | \$46.4           | \$47.5           | \$47.3           | \$47.7           |
| Non-physician care**                | \$15.1           | \$14.9           | \$15.4           | \$17.2           | \$16.9           | \$17.4           | \$19.0           | \$18.7           | \$19.2           | \$20.7           | \$20.5           | \$21.0           |
| <b>Total Direct Cost</b>            | <b>\$4,465.5</b> | <b>\$4,435.7</b> | <b>\$4,495.3</b> | <b>\$4,613.5</b> | <b>\$4,583.3</b> | <b>\$4,643.7</b> | <b>\$5,031.7</b> | <b>\$4,999.8</b> | <b>\$5,063.6</b> | <b>\$5,364.2</b> | <b>\$5,330.7</b> | <b>\$5,397.6</b> |

**Note:** Data for assistive devices were missing from September 2010 onwards, data for cancer and dialysis clinics were missing for 2005, and data for psychiatric hospitalizations were missing from January 2005 to September 2005. Costs are presented for matched cancer patients (cases) only.

\* 'Drugs' includes outpatient prescription drugs covered by the provincial government payer.

\*\* 'Non-physician care' includes care provided by other professionals outside the hospital setting.

**Source:** Data housed at Institute for Clinical Evaluative Sciences.

## V. Costs in Canada

Table A8 – Total (net) public expenditures on cancer care by provincial/territorial governments in Canada, by cost component, sex and year (constant 2015 \$000,000)

|                   | 2005             | 2006             | 2007             | 2008             | 2009             | 2010             | 2011             | 2012             |
|-------------------|------------------|------------------|------------------|------------------|------------------|------------------|------------------|------------------|
| <b>Both Sexes</b> |                  |                  |                  |                  |                  |                  |                  |                  |
| Hospital Care     | \$1,645.7        | \$1,828.7        | \$2,463.1        | \$2,600.1        | \$2,600.6        | \$2,748.8        | \$3,669.2        | \$4,399.2        |
| Chemotherapy      | \$186.7          | \$286.9          | \$412.0          | \$484.4          | \$495.9          | \$563.8          | \$670.9          | \$708.2          |
| Radiation Therapy | \$208.8          | \$301.7          | \$360.0          | \$450.3          | \$476.9          | \$533.9          | \$563.2          | \$627.2          |
| Physician Care    | \$496.4          | \$549.5          | \$608.3          | \$697.4          | \$717.6          | \$750.3          | \$782.3          | \$888.4          |
| Drugs             | \$209.9          | \$230.4          | \$255.5          | \$295.0          | \$298.0          | \$331.7          | \$368.8          | \$449.9          |
| Other Care        | \$199.5          | \$387.0          | \$368.0          | \$410.9          | \$347.6          | \$323.4          | \$333.5          | \$398.9          |
| <b>Total</b>      | <b>\$2,947.0</b> | <b>\$3,584.4</b> | <b>\$4,466.8</b> | <b>\$4,938.1</b> | <b>\$4,936.6</b> | <b>\$5,252.0</b> | <b>\$6,387.9</b> | <b>\$7,472.0</b> |
| <b>Female</b>     |                  |                  |                  |                  |                  |                  |                  |                  |
| Hospital Care     | \$778.1          | \$861.2          | \$1,198.1        | \$1,308.3        | \$1,239.3        | \$1,300.8        | \$1,743.1        | \$2,027.3        |
| Chemotherapy      | \$87.8           | \$135.6          | \$196.1          | \$218.5          | \$204.1          | \$226.5          | \$324.9          | \$389.4          |
| Radiation Therapy | \$119.2          | \$207.8          | \$243.4          | \$281.1          | \$286.9          | \$314.9          | \$316.9          | \$333.8          |
| Physician Care    | \$245.2          | \$276.0          | \$302.5          | \$347.3          | \$351.6          | \$369.4          | \$382.0          | \$426.8          |
| Drugs             | \$70.8           | \$86.9           | \$102.3          | \$124.1          | \$125.8          | \$135.2          | \$151.3          | \$183.4          |
| Other Care*       | \$117.1          | \$224.1          | \$222.7          | \$244.3          | \$194.3          | \$176.7          | \$179.9          | \$210.1          |
| <b>Total</b>      | <b>\$1,418.2</b> | <b>\$1,791.6</b> | <b>\$2,265.1</b> | <b>\$2,523.5</b> | <b>\$2,402.1</b> | <b>\$2,523.4</b> | <b>\$3,098.1</b> | <b>\$3,570.7</b> |
| <b>Male</b>       |                  |                  |                  |                  |                  |                  |                  |                  |
| Hospital Care     | \$867.5          | \$967.6          | \$1,265.0        | \$1,291.8        | \$1,361.3        | \$1,448.1        | \$1,926.1        | \$2,372.0        |
| Chemotherapy      | \$98.9           | \$151.3          | \$215.9          | \$265.9          | \$291.8          | \$337.4          | \$346.0          | \$318.9          |
| Radiation Therapy | \$89.6           | \$93.9           | \$116.5          | \$169.2          | \$190.0          | \$219.0          | \$246.4          | \$293.4          |
| Physician Care    | \$251.1          | \$273.5          | \$305.8          | \$350.1          | \$366.0          | \$380.8          | \$400.3          | \$461.6          |
| Drugs             | \$139.1          | \$143.6          | \$153.2          | \$170.9          | \$172.2          | \$196.5          | \$217.5          | \$266.6          |
| Other Care*       | \$82.4           | \$162.9          | \$145.3          | \$166.6          | \$153.3          | \$146.8          | \$153.6          | \$188.8          |
| <b>Total</b>      | <b>\$1,528.8</b> | <b>\$1,792.8</b> | <b>\$2,201.7</b> | <b>\$2,414.6</b> | <b>\$2,534.6</b> | <b>\$2,728.5</b> | <b>\$3,289.8</b> | <b>\$3,901.3</b> |

\*'Other Care' includes home care, non-physician care (including other professional services), diagnostic testing, and assistive devices.

**Source:** Costs for Canada were estimated using a combination of purpose-derived estimates of mean net cost of cancer in Ontario, National Health Expenditures (NHEX) data on relative expenditures by cost category for each province versus Ontario (Table E),<sup>5</sup> and prevalence figures for each province/territory, which we estimated based on data from the Canadian Cancer Society (CCS) and Statistics Canada<sup>1-3</sup> and NHEX data on population by age, sex and province/territory for 2005–2012.<sup>5</sup>

## References

1. Canadian Cancer Society's Steering Committee on Cancer Statistics. 2009. Canadian Cancer Statistics 2009. Toronto, ON: Canadian Cancer Society; 2009. Available online: <http://www.cancer.ca/en/cancer-information/cancer-101/canadian-cancer-statistics-publication/past-editions-canadian-cancer-statistics/?region=on> (Accessed: March 29, 2016).
2. Canadian Cancer Society's Steering Committee on Cancer Statistics. 2011. Canadian Cancer Statistics 2011. Toronto, ON: Canadian Cancer Society; 2011. Available online: <http://www.cancer.ca/en/cancer-information/cancer-101/canadian-cancer-statistics-publication/past-editions-canadian-cancer-statistics/?region=on> (Accessed: March 29, 2016).
3. Canadian Cancer Society's Advisory Committee on Cancer Statistics. 2014. Canadian Cancer Statistics 2014. Toronto, ON: Canadian Cancer Society; 2014. Available online: <http://www.cancer.ca/en/cancer-information/cancer-101/canadian-cancer-statistics-publication/past-editions-canadian-cancer-statistics/?region=on> (Accessed: March 29, 2016).
4. Mariotto AB, Rowland JH, Ries LAG, Scoppa S, Feuer EJ. Multiple Cancer Prevalence: A Growing Challenge in Long-term Survivorship. *Cancer Epidemiol Biomarkers Prev* 2007;16:566-571.
5. Canadian Institute for Health Information. 2016. National Health Expenditures Database (NHEX) Metadata. Available online: <https://www.cihi.ca/en/spending-and-health-workforce/spending/health-spending-data/national-health-expenditure-database> (Accessed: March 30, 2016).
