# Supplementary material
Source: PubMed Central journal article supplement (PMC5878959)
Supplement: supp_6.1.E1_strobe.pdf [file supp_6.1.E1_strobe.pdf]

STROBE Statement—checklist of items that should be included in reports of observational studies

|                           | <b>Item No</b> | <b>Recommendation</b>                                                                                                                                                                                                                                                                                                                                                                                                                                                  | <b>Location in study</b>                                                                                                                                                                                |
|---------------------------|----------------|------------------------------------------------------------------------------------------------------------------------------------------------------------------------------------------------------------------------------------------------------------------------------------------------------------------------------------------------------------------------------------------------------------------------------------------------------------------------|---------------------------------------------------------------------------------------------------------------------------------------------------------------------------------------------------------|
| <b>Title and abstract</b> | 1              | (a) Indicate the study’s design with a commonly used term in the title or the abstract                                                                                                                                                                                                                                                                                                                                                                                 | Methods section in abstract                                                                                                                                                                             |
|                           |                | (b) Provide in the abstract an informative and balanced summary of what was done and what was found                                                                                                                                                                                                                                                                                                                                                                    | Method section in abstract                                                                                                                                                                              |
| <b>Introduction</b>       |                |                                                                                                                                                                                                                                                                                                                                                                                                                                                                        |                                                                                                                                                                                                         |
| Background/rationale      | 2              | Explain the scientific background and rationale for the investigation being reported                                                                                                                                                                                                                                                                                                                                                                                   | Last sentence of the 1 <sup>st</sup> paragraph in the Introduction; last two sentences of the 2 <sup>nd</sup> paragraph in the Introduction                                                             |
| Objectives                | 3              | State specific objectives, including any prespecified hypotheses                                                                                                                                                                                                                                                                                                                                                                                                       | Last sentence of the 2 <sup>nd</sup> paragraph in the Introduction                                                                                                                                      |
| <b>Methods</b>            |                |                                                                                                                                                                                                                                                                                                                                                                                                                                                                        |                                                                                                                                                                                                         |
| Study design              | 4              | Present key elements of study design early in the paper                                                                                                                                                                                                                                                                                                                                                                                                                | Study Design sub-section (2 <sup>nd</sup> paragraph of Methods section)                                                                                                                                 |
| Setting                   | 5              | Describe the setting, locations, and relevant dates, including periods of recruitment, exposure, follow-up, and data collection                                                                                                                                                                                                                                                                                                                                        | Setting sub-section (1 <sup>st</sup> paragraph of Methods section)                                                                                                                                      |
| Participants              | 6              | (a) <i>Cohort study</i> —Give the eligibility criteria, and the sources and methods of selection of participants. Describe methods of follow-up<br><i>Case-control study</i> —Give the eligibility criteria, and the sources and methods of case ascertainment and control selection. Give the rationale for the choice of cases and controls<br><i>Cross-sectional study</i> —Give the eligibility criteria, and the sources and methods of selection of participants | Sub-sections ‘Identification of patients with cancer or in remission (cases)’ and ‘Selection of non-cancer patients (controls)’ (4 <sup>th</sup> and 5 <sup>th</sup> paragraphs of the Methods section) |
|                           |                | (b) <i>Cohort study</i> —For matched studies, give matching criteria and number of exposed and unexposed<br><i>Case-control study</i> —For matched studies, give matching criteria and the number of controls per case                                                                                                                                                                                                                                                 | Sub-section ‘Matching of cases and controls’ (6 <sup>th</sup> paragraph of the Methods section)                                                                                                         |
| Variables                 | 7              | Clearly define all outcomes, exposures, predictors, potential confounders, and effect modifiers. Give diagnostic criteria, if applicable                                                                                                                                                                                                                                                                                                                               | Outcomes (i.e. costs) described in 7 <sup>th</sup> , 8 <sup>th</sup> (patient-level costs) and 12 <sup>th</sup> (national-level costs) paragraphs of the Methods section                                |
| Data sources/measurement  | 8*             | For each variable of interest, give sources of data and details of methods of assessment (measurement). Describe comparability of assessment methods if there is more than                                                                                                                                                                                                                                                                                             | Sub-section ‘Data Sources’ (3 <sup>rd</sup> paragraph of Methods section)                                                                                                                               |

| one group              |     |                                                                                                                                                                                                                                                                                                           |                                                                                                                                                                                                         |
|------------------------|-----|-----------------------------------------------------------------------------------------------------------------------------------------------------------------------------------------------------------------------------------------------------------------------------------------------------------|---------------------------------------------------------------------------------------------------------------------------------------------------------------------------------------------------------|
| Bias                   | 9   | Describe any efforts to address potential sources of bias                                                                                                                                                                                                                                                 | Sub-section 'Matching of cases and controls' (6 <sup>th</sup> paragraph of the Methods section)                                                                                                         |
| Study size             | 10  | Explain how the study size was arrived at                                                                                                                                                                                                                                                                 | Sub-sections 'Identification of patients with cancer or in remission (cases)' and 'Selection of non-cancer patients (controls)' (4 <sup>th</sup> and 5 <sup>th</sup> paragraphs of the Methods section) |
| Quantitative variables | 11  | Explain how quantitative variables were handled in the analyses. If applicable, describe which groupings were chosen and why                                                                                                                                                                              | Paragraph 13 <sup>th</sup> of Methods section                                                                                                                                                           |
| Statistical methods    | 12  | (a) Describe all statistical methods, including those used to control for confounding                                                                                                                                                                                                                     | Sub-sections 'Matching of cases and controls' (6 <sup>th</sup> paragraph of the Methods section) and 'Calculation of patient-level net costs' (10 <sup>th</sup> paragraph of Methods section)           |
|                        |     | (b) Describe any methods used to examine subgroups and interactions                                                                                                                                                                                                                                       | N/A                                                                                                                                                                                                     |
|                        |     | (c) Explain how missing data were addressed                                                                                                                                                                                                                                                               | 9 <sup>th</sup> , 11 <sup>th</sup> and 12 <sup>th</sup> paragraphs of Methods section                                                                                                                   |
|                        |     | (d) <i>Cohort study</i> —If applicable, explain how loss to follow-up was addressed<br><i>Case-control study</i> —If applicable, explain how matching of cases and controls was addressed<br><i>Cross-sectional study</i> —If applicable, describe analytical methods taking account of sampling strategy | Sub-section 'Matching of cases and controls' (6 <sup>th</sup> paragraph of the Methods section)                                                                                                         |
|                        |     | (e) Describe any sensitivity analyses                                                                                                                                                                                                                                                                     | 7 <sup>th</sup> paragraph of Methods section (more details in Appendix)                                                                                                                                 |
| <b>Results</b>         |     |                                                                                                                                                                                                                                                                                                           |                                                                                                                                                                                                         |
| Participants           | 13* | (a) Report numbers of individuals at each stage of study—eg numbers potentially eligible, examined for eligibility, confirmed eligible, included in the study, completing follow-up, and analysed                                                                                                         | 1 <sup>st</sup> paragraph of Results section (further details in Appendix)                                                                                                                              |
|                        |     | (b) Give reasons for non-participation at each stage                                                                                                                                                                                                                                                      | 4 <sup>th</sup> and 5 <sup>th</sup> paragraphs of Methods section (explains why some                                                                                                                    |

individuals were not included in the analysis)

|                          |     |                                                                                                                                                                                                              |                                                                            |
|--------------------------|-----|--------------------------------------------------------------------------------------------------------------------------------------------------------------------------------------------------------------|----------------------------------------------------------------------------|
|                          |     | (c) Consider use of a flow diagram                                                                                                                                                                           |                                                                            |
| Descriptive data         | 14* | (a) Give characteristics of study participants (eg demographic, clinical, social) and information on exposures and potential confounders                                                                     | 1 <sup>st</sup> paragraph of Results section (further details in Appendix) |
|                          |     | (b) Indicate number of participants with missing data for each variable of interest                                                                                                                          | N/A                                                                        |
|                          |     | (c) <i>Cohort study</i> —Summarise follow-up time (eg, average and total amount)                                                                                                                             | N/A                                                                        |
| Outcome data             | 15* | <i>Cohort study</i> —Report numbers of outcome events or summary measures over time                                                                                                                          | N/A                                                                        |
|                          |     | <i>Case-control study</i> —Report numbers in each exposure category, or summary measures of exposure                                                                                                         | 2 <sup>nd</sup> and 3 <sup>rd</sup> paragraphs of Results section          |
|                          |     | <i>Cross-sectional study</i> —Report numbers of outcome events or summary measures                                                                                                                           | N/A                                                                        |
| Main results             | 16  | (a) Give unadjusted estimates and, if applicable, confounder-adjusted estimates and their precision (eg, 95% confidence interval). Make clear which confounders were adjusted for and why they were included | 2 <sup>nd</sup> and 3 <sup>rd</sup> paragraphs of Results section          |
|                          |     | (b) Report category boundaries when continuous variables were categorized                                                                                                                                    | N/A                                                                        |
|                          |     | (c) If relevant, consider translating estimates of relative risk into absolute risk for a meaningful time period                                                                                             | N/A                                                                        |
| Other analyses           | 17  | Report other analyses done—eg analyses of subgroups and interactions, and sensitivity analyses                                                                                                               | Tables in Appendix                                                         |
| <b>Discussion</b>        |     |                                                                                                                                                                                                              |                                                                            |
| Key results              | 18  | Summarise key results with reference to study objectives                                                                                                                                                     | 1 <sup>st</sup> paragraph of Interpretation section                        |
| Limitations              | 19  | Discuss limitations of the study, taking into account sources of potential bias or imprecision. Discuss both direction and magnitude of any potential bias                                                   | 7 <sup>th</sup> to 9 <sup>th</sup> paragraphs of Interpretation section    |
| Interpretation           | 20  | Give a cautious overall interpretation of results considering objectives, limitations, multiplicity of analyses, results from similar studies, and other relevant evidence                                   | 2 <sup>nd</sup> to 5 <sup>th</sup> paragraphs of Interpretation section    |
| Generalisability         | 21  | Discuss the generalisability (external validity) of the study results                                                                                                                                        | 8 <sup>th</sup> paragraph of Interpretation section                        |
| <b>Other information</b> |     |                                                                                                                                                                                                              |                                                                            |
| Funding                  | 22  | Give the source of funding and the role of the funders for the present study and, if applicable, for the original study on which the present article is based                                                | Page 3 of the manuscript                                                   |

\*Give information separately for cases and controls in case-control studies and, if applicable, for exposed and unexposed groups in cohort and cross-sectional studies.

**Note:** An Explanation and Elaboration article discusses each checklist item and gives methodological background and published examples of transparent reporting. The STROBE checklist is best used in conjunction with this article (freely available on the Web sites of PLoS Medicine at <http://www.plosmedicine.org/>, Annals of Internal Medicine at <http://www.annals.org/>, and Epidemiology at <http://www.epidem.com/>). Information on the STROBE Initiative is available at [www.strobe-statement.org](http://www.strobe-statement.org).
